# Supplementary material for: Local domestication of lactic acid bacteria via cassava beer fermentation
Source: PeerJ. 2014 Jul 8;2:e479. doi: 10.7717/peerj.479 (PMC4103073; doi:10.7717/peerj.479)
Supplement: Supplemental Information 2 — Genus level OTU abundances for chicha, water, and unfermented sample. Sort data by column to view data on OTU abundance by sample. Sample ID Legend can be found on second sheet of the file (“Sample Legend”). [file peerj-02-479-s002.xlsx]

## Sheet: Sheet1
Legend (genus level)		Total		Water 1	Water 2	Unfermented	H1a	H1b	H1c	H2a	H2b	H2c	H3a	H3b	H4a	H4b	H4c	V2H1a	V2H1b	V2H2a
	Taxonomy	count	%	%	%	%	%	%	%	%	%	%	%	%	%	%	%	%	%	%
	None;Other;Other;Other;Other;Other	0	0.022	0.025	0.026	0.025	0.055	0.018	0.014	0.014	0.033	0.018	0.014	0.034	0.011	0.024	0.021	0.011	0.011	0.012
	Unclassified;Other;Other;Other;Other;Other	0	0	0.001	0	0	0	0	0	0	0	0	0	0	0	0	0	0	0	0
	k__Archaea;Other;Other;Other;Other;Other	0	0	0	0	0	0	0	0	0	0	0	0	0	0	0	0	0	0	0
	k__Archaea;p__Crenarchaeota;c__MCG;o__;f__;g__	0	0	0	0	0	0	0	0	0	0	0	0	0	0	0	0	0	0	0
	k__Archaea;p__Crenarchaeota;c__MCG;o__pGrfC26;f__;g__	0	0	0.001	0	0	0	0	0	0	0	0	0	0	0	0	0	0	0	0
	k__Archaea;p__Crenarchaeota;c__Thaumarchaeota;o__AK31;f__;g__	0	0	0	0	0	0	0	0	0	0	0	0	0	0	0	0	0	0	0
	k__Archaea;p__Crenarchaeota;c__Thaumarchaeota;o__Cenarchaeales;Other;Other	0	0	0	0	0	0	0	0	0	0	0	0	0	0	0	0	0	0	0
	k__Archaea;p__Crenarchaeota;c__Thaumarchaeota;o__Cenarchaeales;f__Cenarchaeaceae;Other	0	0	0	0	0	0	0	0	0	0	0	0	0	0	0	0	0	0	0
	k__Archaea;p__Crenarchaeota;c__Thaumarchaeota;o__Cenarchaeales;f__Cenarchaeaceae;g__	0	0	0.002	0	0	0	0	0	0	0	0	0	0	0	0	0	0	0	0
	k__Archaea;p__Crenarchaeota;c__Thaumarchaeota;o__Cenarchaeales;f__SAGMA-X;g__	0	0	0	0	0	0	0	0	0	0	0	0	0	0	0	0	0	0	0
	k__Archaea;p__Crenarchaeota;c__Thaumarchaeota;o__Nitrososphaerales;f__Nitrososphaeraceae;g__Candidatus Nitrososphaera	0	0	0	0	0	0	0	0	0	0	0	0	0	0	0	0	0	0	0
	k__Archaea;p__Euryarchaeota;Other;Other;Other;Other	0	0	0.002	0.001	0	0	0	0	0	0	0	0	0	0	0	0	0	0	0
	k__Archaea;p__Euryarchaeota;c__DSEG;Other;Other;Other	0	0	0	0	0	0	0	0	0	0	0	0	0	0	0	0	0	0	0
	k__Archaea;p__Euryarchaeota;c__DSEG;o__104A5;f__;g__	0	0	0	0	0	0	0	0	0	0	0	0	0	0	0	0	0	0	0
	k__Archaea;p__Euryarchaeota;c__DSEG;o__ArcA07;f__;g__	0	0	0.001	0	0	0	0	0	0	0	0	0	0	0	0	0	0	0	0
	k__Archaea;p__Euryarchaeota;c__Methanobacteria;o__Methanobacteriales;f__MSBL1;g__SAGMEG-1	0	0	0	0	0	0	0	0	0	0	0	0	0	0	0	0	0	0	0
	k__Archaea;p__Euryarchaeota;c__Methanobacteria;o__Methanobacteriales;f__Methanobacteriaceae;g__Methanobacterium	0	0	0	0	0	0	0	0	0	0	0	0	0	0	0	0	0	0	0
	k__Archaea;p__Euryarchaeota;c__Methanobacteria;o__Methanobacteriales;f__Methanobacteriaceae;g__Methanobrevibacter	0	0	0	0	0	0	0	0	0	0	0	0	0	0	0	0	0	0	0
	k__Archaea;p__Euryarchaeota;c__Methanomicrobia;o__;f__;g__	0	0	0	0	0	0	0	0	0	0	0	0	0	0	0	0	0	0	0
	k__Archaea;p__Euryarchaeota;c__Methanomicrobia;o__Methanocellales;f__Methanocellaceae;g__Methanocella	0	0	0	0	0	0	0	0	0	0	0	0	0	0	0	0	0	0	0
	k__Archaea;p__Euryarchaeota;c__Methanomicrobia;o__Methanomicrobiales;Other;Other	0	0	0	0	0	0	0	0	0	0	0	0	0	0	0	0	0	0	0
	k__Archaea;p__Euryarchaeota;c__Methanomicrobia;o__Methanomicrobiales;f__Methanomicrobiaceae;g__	0	0	0	0	0	0	0	0	0	0	0	0	0	0	0	0	0	0	0
	k__Archaea;p__Euryarchaeota;c__Methanomicrobia;o__Methanosarcinales;f__Methanosaetaceae;g__Methanosaeta	0	0	0	0	0	0	0	0	0	0	0	0	0	0	0	0	0	0	0
	k__Archaea;p__Euryarchaeota;c__Thermoplasmata;o__E2;Other;Other	0	0	0	0	0	0	0	0	0	0	0	0	0	0	0	0	0	0	0
	k__Archaea;p__Euryarchaeota;c__Thermoplasmata;o__E2;f__;g__	0	0	0	0	0	0	0	0	0	0	0	0	0	0	0	0	0	0	0
	k__Archaea;p__Euryarchaeota;c__Thermoplasmata;o__E2;f__CCA47;g__	0	0	0	0	0	0	0	0	0	0	0	0	0	0	0	0	0	0	0
	k__Archaea;p__Euryarchaeota;c__Thermoplasmata;o__E2;f__DHVEG-1;g__	0	0	0	0	0	0	0	0	0	0	0	0	0	0	0	0	0	0	0
	k__Archaea;p__Euryarchaeota;c__[Micrarchaea];o__[Micrarchaeles];f__;g__	0	0	0	0	0	0	0	0	0	0	0	0	0	0	0	0	0	0	0
	k__Archaea;p__Euryarchaeota;c__[Parvarchaea];Other;Other;Other	0	0	0	0	0	0	0	0	0	0	0	0	0	0	0	0	0	0	0
	k__Archaea;p__Euryarchaeota;c__[Parvarchaea];o__WCHD3-30;f__;g__	0	0	0.004	0.001	0	0	0	0	0	0	0	0	0	0	0	0	0	0	0
	k__Archaea;p__Euryarchaeota;c__[Parvarchaea];o__YLA114;f__;g__	0	0	0.005	0.002	0	0	0	0	0	0	0	0	0	0	0	0	0	0	0
	k__Bacteria;Other;Other;Other;Other;Other	0	0.006	0.072	0.026	0.006	0.001	0.001	0.001	0	0	0	0	0.001	0	0.001	0	0	0.001	0
	k__Bacteria;p__AC1;c__;o__;f__;g__	0	0	0	0	0	0	0	0	0	0	0	0	0	0	0	0	0	0	0
	k__Bacteria;p__AC1;c__HDBW-WB69;o__;f__;g__	0	0	0	0	0	0	0	0	0	0	0	0	0	0	0	0	0	0	0
	k__Bacteria;p__Acidobacteria;Other;Other;Other;Other	0	0	0	0	0	0	0	0	0	0	0	0	0	0	0	0	0	0	0
	k__Bacteria;p__Acidobacteria;c__;o__;f__;g__	0	0	0.001	0	0	0	0	0	0	0	0	0	0	0	0	0	0	0	0
	k__Bacteria;p__Acidobacteria;c__Acidobacteria;o__Acidobacteriales;f__Acidobacteriaceae;Other	0	0	0	0	0	0	0	0	0	0	0	0	0	0	0	0	0	0	0
	k__Bacteria;p__Acidobacteria;c__Acidobacteria;o__Acidobacteriales;f__Acidobacteriaceae;g__	0	0	0	0	0	0	0.001	0	0	0	0	0	0	0	0	0	0	0	0
	k__Bacteria;p__Acidobacteria;c__Acidobacteria;o__Acidobacteriales;f__Acidobacteriaceae;g__Terriglobus	0	0	0	0	0	0	0	0	0	0	0	0	0	0	0	0	0	0	0
	k__Bacteria;p__Acidobacteria;c__Acidobacteria;o__Acidobacteriales;f__Koribacteraceae;g__	0	0	0	0	0	0	0	0	0	0	0	0	0	0	0	0	0	0	0
	k__Bacteria;p__Acidobacteria;c__Acidobacteria-2;o__;f__;g__	0	0	0	0	0	0	0	0	0	0	0	0	0	0	0	0	0	0	0
	k__Bacteria;p__Acidobacteria;c__Acidobacteria-5;o__;f__;g__	0	0	0.001	0	0	0	0	0	0	0	0	0	0	0	0	0	0	0	0
	k__Bacteria;p__Acidobacteria;c__Acidobacteria-6;Other;Other;Other	0	0	0	0	0	0	0	0	0	0	0	0	0	0	0	0	0	0	0
	k__Bacteria;p__Acidobacteria;c__Acidobacteria-6;o__;f__;g__	0	0	0	0	0	0	0	0	0	0	0	0	0	0	0	0	0	0	0
	k__Bacteria;p__Acidobacteria;c__Acidobacteria-6;o__CCU21;f__;g__	0	0	0	0	0	0	0	0	0	0	0	0	0	0	0	0	0	0	0
	k__Bacteria;p__Acidobacteria;c__Acidobacteria-6;o__iii1-15;f__;g__	0	0	0.002	0.001	0	0	0	0	0	0	0	0	0	0	0	0	0	0	0
	k__Bacteria;p__Acidobacteria;c__Acidobacteria-6;o__iii1-15;f__RB40;g__	0	0	0.001	0	0	0	0	0	0	0	0	0	0	0	0	0	0	0	0
	k__Bacteria;p__Acidobacteria;c__Acidobacteria-6;o__iii1-15;f__mb2424;g__	0	0	0	0	0	0	0	0	0	0	0	0	0	0	0	0	0	0	0
	k__Bacteria;p__Acidobacteria;c__Chloracidobacteria;o__;f__;g__	0	0	0	0	0	0	0	0	0	0	0	0	0	0	0	0	0	0	0
	k__Bacteria;p__Acidobacteria;c__EC1113;o__;f__;g__	0	0	0	0	0	0	0	0	0	0	0	0	0	0	0	0	0	0	0
	k__Bacteria;p__Acidobacteria;c__Holophagae;o__Holophagales;Other;Other	0	0	0	0	0	0	0	0	0	0	0	0	0	0	0	0	0	0	0
	k__Bacteria;p__Acidobacteria;c__Holophagae;o__Holophagales;f__;g__	0	0	0	0	0	0	0	0	0	0	0	0	0	0	0	0	0	0	0
	k__Bacteria;p__Acidobacteria;c__Holophagae;o__Holophagales;f__Holophagaceae;Other	0	0	0	0	0	0	0	0	0	0	0	0	0	0	0	0	0	0	0
	k__Bacteria;p__Acidobacteria;c__Holophagae;o__Holophagales;f__Holophagaceae;g__	0	0	0	0	0	0	0	0	0	0	0	0	0	0	0	0	0	0	0
	k__Bacteria;p__Acidobacteria;c__Holophagae;o__Holophagales;f__Holophagaceae;g__Geothrix	0	0	0	0	0	0	0	0	0	0	0	0	0	0	0	0	0	0	0
	k__Bacteria;p__Acidobacteria;c__MVS-40;o__;f__;g__	0	0	0.001	0	0	0	0	0	0	0	0	0	0	0	0	0	0	0	0
	k__Bacteria;p__Acidobacteria;c__RB25;o__;f__;g__	0	0	0	0	0	0	0	0	0	0	0	0	0	0	0	0	0	0	0
	k__Bacteria;p__Acidobacteria;c__Solibacteres;o__Solibacterales;f__Solibacteraceae;g__Candidatus Solibacter	0	0	0.001	0.001	0	0	0	0	0	0	0	0	0	0	0	0	0	0	0
	k__Bacteria;p__Acidobacteria;c__Sva0725;o__Sva0725;f__;g__	0	0	0	0	0	0	0	0	0	0	0	0	0	0	0	0	0	0	0
	k__Bacteria;p__Acidobacteria;c__TM1;o__;f__;g__	0	0	0	0	0	0	0	0	0	0	0	0	0	0	0	0	0	0	0
	k__Bacteria;p__Acidobacteria;c__iii1-8;o__32-20;f__;g__	0	0	0	0	0	0	0	0	0	0	0	0	0	0	0	0	0	0	0
	k__Bacteria;p__Acidobacteria;c__iii1-8;o__SJA-36;f__;g__	0	0	0	0	0	0	0	0	0	0	0	0	0	0	0	0	0	0	0
	k__Bacteria;p__Actinobacteria;Other;Other;Other;Other	0	0	0.001	0	0	0	0	0	0	0	0	0	0	0	0	0	0	0	0
	k__Bacteria;p__Actinobacteria;c__Acidimicrobiia;o__Acidimicrobiales;Other;Other	0	0	0	0	0	0	0	0	0	0	0	0	0	0	0	0	0	0	0
	k__Bacteria;p__Actinobacteria;c__Acidimicrobiia;o__Acidimicrobiales;f__;g__	0	0	0.001	0	0	0	0	0	0	0	0	0	0	0	0	0	0	0	0
	k__Bacteria;p__Actinobacteria;c__Acidimicrobiia;o__Acidimicrobiales;f__C111;g__	0	0	0	0	0	0	0	0	0	0	0	0	0	0	0	0	0	0	0
	k__Bacteria;p__Actinobacteria;c__Acidimicrobiia;o__Acidimicrobiales;f__EB1017;g__	0	0	0.001	0	0	0	0	0	0	0	0	0	0	0	0	0	0	0	0
	k__Bacteria;p__Actinobacteria;c__Acidimicrobiia;o__Acidimicrobiales;f__JdFBGBact;g__	0	0	0	0	0	0	0	0	0	0	0	0	0	0	0	0	0	0	0
	k__Bacteria;p__Actinobacteria;c__Acidimicrobiia;o__Acidimicrobiales;f__Microthrixaceae;g__	0	0	0	0	0	0	0	0	0	0	0	0	0	0	0	0	0	0	0
	k__Bacteria;p__Actinobacteria;c__Acidimicrobiia;o__Acidimicrobiales;f__koll13;g__	0	0	0	0	0	0	0	0	0	0	0	0	0	0	0	0	0	0	0
	k__Bacteria;p__Actinobacteria;c__Actinobacteria;Other;Other;Other	0	0	0	0	0	0	0	0	0	0	0	0	0	0	0	0	0	0	0
	k__Bacteria;p__Actinobacteria;c__Actinobacteria;o__Actinomycetales;Other;Other	0	0	0.003	0.002	0	0	0	0	0	0	0	0	0	0	0.001	0	0	0	0
	k__Bacteria;p__Actinobacteria;c__Actinobacteria;o__Actinomycetales;f__;g__	0	0	0	0.001	0	0	0	0	0	0	0	0	0	0	0	0	0	0	0
	k__Bacteria;p__Actinobacteria;c__Actinobacteria;o__Actinomycetales;f__ACK-M1;g__	0	0	0.001	0	0	0	0	0	0	0	0	0	0	0	0	0	0	0	0
	k__Bacteria;p__Actinobacteria;c__Actinobacteria;o__Actinomycetales;f__Actinomycetaceae;Other	0	0	0.001	0	0	0	0	0	0	0	0	0	0	0	0	0	0	0	0
	k__Bacteria;p__Actinobacteria;c__Actinobacteria;o__Actinomycetales;f__Actinomycetaceae;g__	0	0	0.001	0	0	0	0	0	0	0	0	0	0	0	0	0	0	0	0
	k__Bacteria;p__Actinobacteria;c__Actinobacteria;o__Actinomycetales;f__Actinomycetaceae;g__Actinomyces	0	0	0	0	0	0	0	0	0	0	0	0	0	0	0	0	0	0	0
	k__Bacteria;p__Actinobacteria;c__Actinobacteria;o__Actinomycetales;f__Actinomycetaceae;g__Parascardovia	0	0	0	0	0	0	0	0	0	0	0	0	0	0	0	0	0	0	0
	k__Bacteria;p__Actinobacteria;c__Actinobacteria;o__Actinomycetales;f__Beutenbergiaceae;g__	0	0	0	0	0	0	0	0	0	0	0	0	0	0	0	0	0	0	0
	k__Bacteria;p__Actinobacteria;c__Actinobacteria;o__Actinomycetales;f__Brevibacteriaceae;g__Brevibacterium	0	0	0	0.001	0	0	0	0	0	0	0	0	0	0	0	0	0	0	0
	k__Bacteria;p__Actinobacteria;c__Actinobacteria;o__Actinomycetales;f__Cellulomonadaceae;Other	0	0	0	0	0	0	0	0	0	0	0	0	0	0	0	0	0	0	0
	k__Bacteria;p__Actinobacteria;c__Actinobacteria;o__Actinomycetales;f__Cellulomonadaceae;g__Cellulomonas	0	0.002	0	0.001	0	0	0	0.009	0	0	0	0	0.009	0	0.023	0	0	0.004	0
	k__Bacteria;p__Actinobacteria;c__Actinobacteria;o__Actinomycetales;f__Cellulomonadaceae;g__Pseudoclavibacter	0	0	0	0	0	0	0	0	0	0	0	0	0	0	0	0	0	0	0
	k__Bacteria;p__Actinobacteria;c__Actinobacteria;o__Actinomycetales;f__Corynebacteriaceae;g__Corynebacterium	0	0	0	0.004	0	0	0	0	0	0	0	0	0	0	0	0	0	0	0
	k__Bacteria;p__Actinobacteria;c__Actinobacteria;o__Actinomycetales;f__Cryptosporangiaceae;g__Cryptosporangium	0	0	0	0	0	0	0	0	0	0	0	0	0	0	0	0	0	0	0
	k__Bacteria;p__Actinobacteria;c__Actinobacteria;o__Actinomycetales;f__Dermabacteraceae;Other	0	0	0	0	0	0	0	0	0	0	0	0	0	0	0	0	0	0	0
	k__Bacteria;p__Actinobacteria;c__Actinobacteria;o__Actinomycetales;f__Dermabacteraceae;g__	0	0	0	0	0	0	0.003	0	0	0	0	0	0	0	0	0	0	0	0
	k__Bacteria;p__Actinobacteria;c__Actinobacteria;o__Actinomycetales;f__Dermabacteraceae;g__Brachybacterium	0	0	0	0	0	0	0	0	0	0	0	0	0	0	0	0	0	0	0
	k__Bacteria;p__Actinobacteria;c__Actinobacteria;o__Actinomycetales;f__Dermacoccaceae;g__Dermacoccus	0	0	0	0	0	0	0	0	0	0	0	0	0	0	0	0	0	0	0
	k__Bacteria;p__Actinobacteria;c__Actinobacteria;o__Actinomycetales;f__Frankiaceae;Other	0	0	0	0	0	0	0	0	0	0	0	0	0	0	0	0	0	0	0
	k__Bacteria;p__Actinobacteria;c__Actinobacteria;o__Actinomycetales;f__Frankiaceae;g__	0	0	0	0	0	0	0	0	0	0	0	0	0	0	0	0	0	0	0
	k__Bacteria;p__Actinobacteria;c__Actinobacteria;o__Actinomycetales;f__Geodermatophilaceae;g__Geodermatophilus	0	0	0	0	0	0	0	0	0	0	0	0	0	0	0	0	0	0	0
	k__Bacteria;p__Actinobacteria;c__Actinobacteria;o__Actinomycetales;f__Gordoniaceae;g__Gordonia	0	0	0	0	0	0	0	0	0	0	0	0	0	0	0	0	0	0	0
	k__Bacteria;p__Actinobacteria;c__Actinobacteria;o__Actinomycetales;f__Intrasporangiaceae;Other	0	0	0	0.001	0	0	0	0	0	0	0	0	0	0	0	0	0	0	0
	k__Bacteria;p__Actinobacteria;c__Actinobacteria;o__Actinomycetales;f__Intrasporangiaceae;g__	0	0	0	0	0	0	0	0	0	0	0	0	0	0	0	0	0	0	0
	k__Bacteria;p__Actinobacteria;c__Actinobacteria;o__Actinomycetales;f__Intrasporangiaceae;g__Terracoccus	0	0	0	0	0	0	0	0	0	0	0	0	0	0	0	0	0	0	0
	k__Bacteria;p__Actinobacteria;c__Actinobacteria;o__Actinomycetales;f__Kineosporiaceae;Other	0	0	0	0	0	0	0	0	0	0	0	0	0	0	0	0	0	0	0
	k__Bacteria;p__Actinobacteria;c__Actinobacteria;o__Actinomycetales;f__Kineosporiaceae;g__	0	0	0.001	0	0	0	0	0	0	0	0	0	0	0	0	0	0	0	0
	k__Bacteria;p__Actinobacteria;c__Actinobacteria;o__Actinomycetales;f__Kineosporiaceae;g__Kineococcus	0	0	0	0	0	0	0	0	0	0	0	0	0	0	0	0	0	0	0
	k__Bacteria;p__Actinobacteria;c__Actinobacteria;o__Actinomycetales;f__Microbacteriaceae;Other	0	0	0.007	0.001	0	0	0	0	0	0	0	0	0	0	0	0	0	0	0
	k__Bacteria;p__Actinobacteria;c__Actinobacteria;o__Actinomycetales;f__Microbacteriaceae;g__	0	0	0.002	0.002	0	0	0	0	0	0	0	0	0	0	0	0	0	0	0
	k__Bacteria;p__Actinobacteria;c__Actinobacteria;o__Actinomycetales;f__Microbacteriaceae;g__Candidatus Rhodoluna	0	0.001	0.012	0.005	0	0	0	0	0	0	0	0	0	0	0	0	0	0	0
	k__Bacteria;p__Actinobacteria;c__Actinobacteria;o__Actinomycetales;f__Microbacteriaceae;g__Salinibacterium	0	0	0	0	0	0	0	0	0	0	0	0	0	0	0	0	0	0	0
	k__Bacteria;p__Actinobacteria;c__Actinobacteria;o__Actinomycetales;f__Micrococcaceae;Other	0	0	0	0.001	0.001	0	0	0	0	0	0	0	0	0	0	0	0	0	0
	k__Bacteria;p__Actinobacteria;c__Actinobacteria;o__Actinomycetales;f__Micrococcaceae;g__	0	0	0	0	0	0	0	0	0	0	0	0	0	0	0	0	0	0	0
	k__Bacteria;p__Actinobacteria;c__Actinobacteria;o__Actinomycetales;f__Micrococcaceae;g__Arthrobacter	0	0	0	0	0	0	0	0	0	0	0	0	0	0	0	0	0	0	0
	k__Bacteria;p__Actinobacteria;c__Actinobacteria;o__Actinomycetales;f__Micrococcaceae;g__Kocuria	0	0	0	0	0	0	0	0	0	0	0	0	0	0	0	0	0	0	0
	k__Bacteria;p__Actinobacteria;c__Actinobacteria;o__Actinomycetales;f__Micrococcaceae;g__Micrococcus	0	0	0	0.001	0	0	0	0	0	0	0	0	0	0	0	0	0	0	0
	k__Bacteria;p__Actinobacteria;c__Actinobacteria;o__Actinomycetales;f__Micrococcaceae;g__Rothia	0	0	0	0	0.001	0	0	0	0	0	0	0	0	0	0	0	0	0	0
	k__Bacteria;p__Actinobacteria;c__Actinobacteria;o__Actinomycetales;f__Micromonosporaceae;Other	0	0	0.001	0.001	0	0	0	0	0	0	0	0	0	0	0	0	0	0	0
	k__Bacteria;p__Actinobacteria;c__Actinobacteria;o__Actinomycetales;f__Micromonosporaceae;g__	0	0	0	0	0	0	0	0	0	0	0	0	0	0	0	0	0	0	0
	k__Bacteria;p__Actinobacteria;c__Actinobacteria;o__Actinomycetales;f__Micromonosporaceae;g__Actinoplanes	0	0	0	0	0	0	0	0	0	0	0	0	0	0	0	0	0	0	0
	k__Bacteria;p__Actinobacteria;c__Actinobacteria;o__Actinomycetales;f__Micromonosporaceae;g__Dactylosporangium	0	0	0	0	0	0	0	0	0	0	0	0	0	0	0	0	0	0	0
	k__Bacteria;p__Actinobacteria;c__Actinobacteria;o__Actinomycetales;f__Micromonosporaceae;g__Pilimelia	0	0	0	0	0	0	0	0	0	0	0	0	0	0	0	0	0	0	0
	k__Bacteria;p__Actinobacteria;c__Actinobacteria;o__Actinomycetales;f__Mycobacteriaceae;g__Mycobacterium	0	0	0.001	0	0	0	0	0	0	0	0	0	0	0	0	0	0	0	0
	k__Bacteria;p__Actinobacteria;c__Actinobacteria;o__Actinomycetales;f__Nocardiaceae;g__Nocardia	0	0	0	0	0	0	0	0	0	0	0	0	0	0	0	0	0	0	0
	k__Bacteria;p__Actinobacteria;c__Actinobacteria;o__Actinomycetales;f__Nocardiaceae;g__Rhodococcus	0	0	0	0	0	0	0	0	0	0	0	0	0	0	0.001	0	0	0	0
	k__Bacteria;p__Actinobacteria;c__Actinobacteria;o__Actinomycetales;f__Nocardioidaceae;Other	0	0	0	0	0	0	0	0	0	0	0	0	0	0	0	0	0	0	0
	k__Bacteria;p__Actinobacteria;c__Actinobacteria;o__Actinomycetales;f__Nocardioidaceae;g__	0	0	0	0	0	0	0	0	0	0	0	0	0	0	0	0	0	0	0
	k__Bacteria;p__Actinobacteria;c__Actinobacteria;o__Actinomycetales;f__Nocardioidaceae;g__Aeromicrobium	0	0	0	0	0	0	0	0	0	0	0	0	0	0	0	0	0	0	0
	k__Bacteria;p__Actinobacteria;c__Actinobacteria;o__Actinomycetales;f__Nocardioidaceae;g__Friedmanniella	0	0	0	0	0	0	0	0	0	0	0	0	0	0	0	0	0	0	0
	k__Bacteria;p__Actinobacteria;c__Actinobacteria;o__Actinomycetales;f__Nocardioidaceae;g__Nocardioides	0	0	0	0	0	0	0	0	0	0	0	0	0	0	0	0	0	0	0
	k__Bacteria;p__Actinobacteria;c__Actinobacteria;o__Actinomycetales;f__Pseudonocardiaceae;Other	0	0	0	0	0	0	0	0	0	0	0	0	0	0	0	0	0	0	0
	k__Bacteria;p__Actinobacteria;c__Actinobacteria;o__Actinomycetales;f__Pseudonocardiaceae;g__Actinomycetospora	0	0	0	0	0	0	0	0	0	0	0	0	0	0	0	0	0	0	0
	k__Bacteria;p__Actinobacteria;c__Actinobacteria;o__Actinomycetales;f__Pseudonocardiaceae;g__Pseudonocardia	0	0	0	0	0	0	0	0	0	0	0	0	0	0	0	0	0	0	0
	k__Bacteria;p__Actinobacteria;c__Actinobacteria;o__Actinomycetales;f__Pseudonocardiaceae;g__Saccharopolyspora	0	0	0	0	0	0	0	0	0	0	0	0	0	0	0	0	0	0	0
	k__Bacteria;p__Actinobacteria;c__Actinobacteria;o__Actinomycetales;f__Sanguibacteraceae;g__Sanguibacter	0	0	0	0	0	0	0	0	0	0	0	0	0	0	0	0	0	0	0
	k__Bacteria;p__Actinobacteria;c__Actinobacteria;o__Actinomycetales;f__Sporichthyaceae;g__	0	0	0	0	0	0	0	0	0	0	0	0	0	0	0	0	0	0	0
	k__Bacteria;p__Actinobacteria;c__Actinobacteria;o__Actinomycetales;f__Streptomycetaceae;g__	0	0	0	0	0	0	0	0	0	0	0	0	0	0	0	0	0	0	0
	k__Bacteria;p__Actinobacteria;c__Actinobacteria;o__Actinomycetales;f__Streptosporangiaceae;g__	0	0	0	0	0	0	0	0	0	0	0	0	0	0	0	0	0	0	0
	k__Bacteria;p__Actinobacteria;c__Actinobacteria;o__Actinomycetales;f__Thermomonosporaceae;g__	0	0	0	0	0	0	0	0	0	0	0	0	0	0	0	0	0	0	0
	k__Bacteria;p__Actinobacteria;c__Actinobacteria;o__Bifidobacteriales;f__Bifidobacteriaceae;Other	0	0	0	0	0	0	0	0	0	0	0	0	0	0	0	0	0	0	0
	k__Bacteria;p__Actinobacteria;c__Actinobacteria;o__Bifidobacteriales;f__Bifidobacteriaceae;g__	0	0	0	0	0	0	0	0	0	0	0	0	0	0	0	0	0	0	0
	k__Bacteria;p__Actinobacteria;c__Actinobacteria;o__Bifidobacteriales;f__Bifidobacteriaceae;g__Gardnerella	0	0	0	0	0	0	0	0	0	0	0	0	0	0	0	0	0	0	0
	k__Bacteria;p__Actinobacteria;c__KIST-JJY010;o__;f__;g__	0	0	0	0	0	0	0	0	0	0	0	0	0	0	0	0	0	0	0
	k__Bacteria;p__Actinobacteria;c__MB-A2-108;o__0319-7L14;f__;g__	0	0	0	0.001	0	0	0	0	0	0	0	0	0	0	0	0	0	0	0
	k__Bacteria;p__Actinobacteria;c__OPB41;o__;f__;g__	0	0	0	0	0	0	0	0	0	0	0	0	0	0	0	0	0	0	0
	k__Bacteria;p__Actinobacteria;c__Rubrobacteria;o__Rubrobacterales;f__Rubrobacteraceae;g__Rubrobacter	0	0	0	0	0	0	0	0	0	0	0	0	0	0	0	0	0	0	0
	k__Bacteria;p__Actinobacteria;c__Thermoleophilia;o__Gaiellales;Other;Other	0	0	0	0	0	0	0	0	0	0	0	0	0	0	0	0	0	0	0
	k__Bacteria;p__Actinobacteria;c__Thermoleophilia;o__Gaiellales;f__;g__	0	0	0	0	0	0	0	0	0	0	0	0	0	0	0	0	0	0	0
	k__Bacteria;p__Actinobacteria;c__Thermoleophilia;o__Gaiellales;f__AK1AB1_02E;g__	0	0	0	0	0	0	0	0	0	0	0	0	0	0	0	0	0	0	0
	k__Bacteria;p__Actinobacteria;c__Thermoleophilia;o__Gaiellales;f__Gaiellaceae;g__	0	0	0.001	0.001	0	0	0	0	0	0	0	0	0	0	0	0	0	0	0
	k__Bacteria;p__Actinobacteria;c__Thermoleophilia;o__Solirubrobacterales;Other;Other	0	0	0	0	0	0	0	0	0	0	0	0	0	0	0	0	0	0	0
	k__Bacteria;p__Actinobacteria;c__Thermoleophilia;o__Solirubrobacterales;f__;g__	0	0	0	0	0	0	0	0	0	0	0	0	0	0	0	0	0	0	0
	k__Bacteria;p__Actinobacteria;c__Thermoleophilia;o__Solirubrobacterales;f__Conexibacteraceae;g__	0	0	0	0	0	0	0	0	0	0	0	0	0	0	0	0	0	0	0
	k__Bacteria;p__Actinobacteria;c__Thermoleophilia;o__Solirubrobacterales;f__Conexibacteraceae;g__Conexibacter	0	0	0	0	0	0	0	0	0	0	0	0	0	0	0	0	0	0	0
	k__Bacteria;p__Actinobacteria;c__Thermoleophilia;o__Solirubrobacterales;f__Patulibacteraceae;g__	0	0	0	0	0	0	0	0	0	0	0	0	0	0	0	0	0	0	0
	k__Bacteria;p__Actinobacteria;c__Thermoleophilia;o__Solirubrobacterales;f__Patulibacteraceae;g__Patulibacter	0	0	0	0	0	0	0	0	0	0	0	0	0	0	0	0	0	0	0
	k__Bacteria;p__Actinobacteria;c__Thermoleophilia;o__Solirubrobacterales;f__Solirubrobacteraceae;Other	0	0	0	0	0	0	0	0	0	0	0	0	0	0	0	0	0	0	0
	k__Bacteria;p__Actinobacteria;c__Thermoleophilia;o__Solirubrobacterales;f__Solirubrobacteraceae;g__	0	0	0	0	0	0	0	0	0	0	0	0	0	0	0	0	0	0	0
	k__Bacteria;p__Armatimonadetes;c__Armatimonadia;o__Armatimonadales;f__Armatimonadaceae;Other	0	0	0	0	0	0	0	0	0	0	0	0	0	0	0	0	0	0	0
	k__Bacteria;p__Armatimonadetes;c__Armatimonadia;o__Armatimonadales;f__Armatimonadaceae;g__Armatimonas	0	0	0	0	0	0	0	0	0	0	0	0	0	0	0	0	0	0	0
	k__Bacteria;p__Armatimonadetes;c__Armatimonadia;o__Armatimonadales;f__WD294;g__	0	0	0	0	0	0	0	0	0	0	0	0	0	0	0	0	0	0	0
	k__Bacteria;p__Armatimonadetes;c__S1a-1H;o__;f__;g__	0	0	0	0	0	0	0	0	0	0	0	0	0	0	0	0	0	0	0
	k__Bacteria;p__Armatimonadetes;c__SJA-176;o__;f__;g__	0	0	0	0	0	0	0	0	0	0	0	0	0	0	0	0	0	0	0
	k__Bacteria;p__Armatimonadetes;c__[Fimbriimonadetes];o__;f__;g__	0	0	0	0	0	0	0	0	0	0	0	0	0	0	0	0	0	0	0
	k__Bacteria;p__Armatimonadetes;c__[Fimbriimonadetes];o__[Fimbriimonadales];f__[Fimbriimonadaceae];Other	0	0	0	0	0	0	0	0	0	0	0	0	0	0	0	0	0	0	0
	k__Bacteria;p__Armatimonadetes;c__[Fimbriimonadetes];o__[Fimbriimonadales];f__[Fimbriimonadaceae];g__	0	0	0	0	0	0	0	0	0	0	0	0	0	0	0	0	0	0	0
	k__Bacteria;p__Armatimonadetes;c__[Fimbriimonadetes];o__[Fimbriimonadales];f__[Fimbriimonadaceae];g__Fimbriimonas	0	0	0	0	0	0	0	0	0	0	0	0	0	0	0	0	0	0	0
	k__Bacteria;p__Bacteroidetes;Other;Other;Other;Other	0	0	0.006	0.002	0	0	0	0	0	0	0	0	0	0	0	0	0	0	0
	k__Bacteria;p__Bacteroidetes;c__;o__;f__;g__	0	0	0	0	0	0	0	0	0	0	0	0	0	0	0	0	0	0	0
	k__Bacteria;p__Bacteroidetes;c__Bacteroidia;o__Bacteroidales;Other;Other	0	0	0.003	0.001	0	0	0	0	0	0	0	0	0	0	0	0	0	0	0
	k__Bacteria;p__Bacteroidetes;c__Bacteroidia;o__Bacteroidales;f__;g__	0	0	0.003	0.003	0	0	0	0	0	0	0	0	0	0	0	0	0	0	0
	k__Bacteria;p__Bacteroidetes;c__Bacteroidia;o__Bacteroidales;f__Bacteroidaceae;Other	0	0	0	0	0	0	0	0	0	0	0	0	0	0	0	0	0	0	0
	k__Bacteria;p__Bacteroidetes;c__Bacteroidia;o__Bacteroidales;f__Bacteroidaceae;g__	0	0	0.001	0	0	0	0	0	0	0	0	0	0	0	0	0	0	0	0
	k__Bacteria;p__Bacteroidetes;c__Bacteroidia;o__Bacteroidales;f__Bacteroidaceae;g__Bacteroides	0	0	0.001	0	0	0	0	0	0	0	0	0	0	0	0	0	0	0	0
	k__Bacteria;p__Bacteroidetes;c__Bacteroidia;o__Bacteroidales;f__Porphyromonadaceae;Other	0	0	0	0	0	0	0	0	0	0	0	0	0	0	0	0	0	0	0
	k__Bacteria;p__Bacteroidetes;c__Bacteroidia;o__Bacteroidales;f__Porphyromonadaceae;g__Candidatus Azobacteroides	0	0	0	0	0	0	0	0	0	0	0	0	0	0	0	0	0	0	0
	k__Bacteria;p__Bacteroidetes;c__Bacteroidia;o__Bacteroidales;f__Porphyromonadaceae;g__Dysgonomonas	0	0	0	0	0	0	0	0	0	0	0	0	0	0	0	0	0	0	0
	k__Bacteria;p__Bacteroidetes;c__Bacteroidia;o__Bacteroidales;f__Porphyromonadaceae;g__Parabacteroides	0	0	0	0	0	0	0	0	0	0	0	0	0	0	0	0	0	0	0
	k__Bacteria;p__Bacteroidetes;c__Bacteroidia;o__Bacteroidales;f__Porphyromonadaceae;g__Porphyromonas	0	0	0	0	0	0	0	0	0	0	0	0	0	0	0	0	0	0	0
	k__Bacteria;p__Bacteroidetes;c__Bacteroidia;o__Bacteroidales;f__Prevotellaceae;g__Prevotella	0	0	0	0	0.001	0	0	0	0	0	0	0	0	0	0	0	0	0	0
	k__Bacteria;p__Bacteroidetes;c__Bacteroidia;o__Bacteroidales;f__Rikenellaceae;Other	0	0	0	0	0	0	0	0	0	0	0	0	0	0	0	0	0	0	0
	k__Bacteria;p__Bacteroidetes;c__Bacteroidia;o__Bacteroidales;f__Rikenellaceae;g__	0	0	0	0	0	0	0	0	0	0	0	0	0	0	0	0	0	0	0
	k__Bacteria;p__Bacteroidetes;c__Bacteroidia;o__Bacteroidales;f__Rikenellaceae;g__PW3	0	0	0	0	0	0	0	0	0	0	0	0	0	0	0	0	0	0	0
	k__Bacteria;p__Bacteroidetes;c__Bacteroidia;o__Bacteroidales;f__Rikenellaceae;g__Rikenella	0	0	0	0	0	0	0	0	0	0	0	0	0	0	0	0	0	0	0
	k__Bacteria;p__Bacteroidetes;c__Bacteroidia;o__Bacteroidales;f__[Paraprevotellaceae];g__Paraprevotella	0	0	0	0	0	0	0	0	0	0	0	0	0	0	0	0	0	0	0
	k__Bacteria;p__Bacteroidetes;c__Bacteroidia;o__Bacteroidales;f__[Paraprevotellaceae];g__[Prevotella]	0	0	0	0	0.001	0	0	0	0	0	0	0	0	0	0	0	0	0	0
	k__Bacteria;p__Bacteroidetes;c__Bacteroidia;o__Bacteroidales;f__p-2534-18B5;g__	0	0	0	0	0	0	0	0	0	0	0	0	0	0	0	0	0	0	0
	k__Bacteria;p__Bacteroidetes;c__Flavobacteriia;Other;Other;Other	0	0	0	0	0	0	0	0	0	0	0	0	0	0	0	0	0	0	0
	k__Bacteria;p__Bacteroidetes;c__Flavobacteriia;o__;f__;g__	0	0	0	0	0	0	0	0	0	0	0	0	0	0	0	0	0	0	0
	k__Bacteria;p__Bacteroidetes;c__Flavobacteriia;o__Flavobacteriales;f__Cryomorphaceae;Other	0	0	0	0	0	0	0	0	0	0	0	0	0	0	0	0	0	0	0
	k__Bacteria;p__Bacteroidetes;c__Flavobacteriia;o__Flavobacteriales;f__Cryomorphaceae;g__	0	0	0	0	0	0	0	0	0	0	0	0	0	0	0	0	0	0	0
	k__Bacteria;p__Bacteroidetes;c__Flavobacteriia;o__Flavobacteriales;f__Cryomorphaceae;g__Fluviicola	0	0	0	0	0	0	0	0	0	0	0	0	0	0	0	0	0	0	0
	k__Bacteria;p__Bacteroidetes;c__Flavobacteriia;o__Flavobacteriales;f__Flavobacteriaceae;Other	0	0	0	0.001	0	0	0	0	0	0	0	0	0	0	0	0	0	0	0
	k__Bacteria;p__Bacteroidetes;c__Flavobacteriia;o__Flavobacteriales;f__Flavobacteriaceae;g__	0	0	0	0	0	0	0	0	0	0	0	0	0	0	0	0	0	0	0
	k__Bacteria;p__Bacteroidetes;c__Flavobacteriia;o__Flavobacteriales;f__Flavobacteriaceae;g__Capnocytophaga	0	0	0	0	0	0	0	0	0	0	0	0	0	0	0	0	0	0	0
	k__Bacteria;p__Bacteroidetes;c__Flavobacteriia;o__Flavobacteriales;f__Flavobacteriaceae;g__Chryseobacterium	0	0	0	0	0	0	0	0	0	0	0	0	0	0	0	0	0	0	0
	k__Bacteria;p__Bacteroidetes;c__Flavobacteriia;o__Flavobacteriales;f__Flavobacteriaceae;g__Elizabethkingia	0	0	0	0	0	0	0	0	0	0	0	0	0	0	0	0	0	0	0
	k__Bacteria;p__Bacteroidetes;c__Flavobacteriia;o__Flavobacteriales;f__Flavobacteriaceae;g__Flavobacterium	0	0	0.002	0.001	0	0	0	0	0	0	0	0	0	0	0	0	0	0	0
	k__Bacteria;p__Bacteroidetes;c__Flavobacteriia;o__Flavobacteriales;f__Flavobacteriaceae;g__Wautersiella	0	0.001	0	0.013	0	0	0	0	0	0	0	0	0	0	0	0	0	0	0
	k__Bacteria;p__Bacteroidetes;c__Sphingobacteriia;o__Sphingobacteriales;Other;Other	0	0	0.002	0	0	0	0	0	0	0	0	0	0	0	0	0	0	0	0
	k__Bacteria;p__Bacteroidetes;c__Sphingobacteriia;o__Sphingobacteriales;f__;g__	0	0	0.005	0.003	0	0	0	0	0	0	0	0	0	0	0	0	0	0	0
	k__Bacteria;p__Bacteroidetes;c__Sphingobacteriia;o__Sphingobacteriales;f__Amoebophilaceae;g__SC3-56	0	0	0	0	0	0	0	0	0	0	0	0	0	0	0	0	0	0	0
	k__Bacteria;p__Bacteroidetes;c__Sphingobacteriia;o__Sphingobacteriales;f__Chitinophagaceae;Other	0	0	0	0	0	0	0	0	0	0	0	0	0	0	0	0	0	0	0
	k__Bacteria;p__Bacteroidetes;c__Sphingobacteriia;o__Sphingobacteriales;f__Chitinophagaceae;g__	0	0.001	0.007	0.003	0	0	0.001	0	0	0	0	0	0	0	0	0	0	0	0
	k__Bacteria;p__Bacteroidetes;c__Sphingobacteriia;o__Sphingobacteriales;f__Chitinophagaceae;g__Chitinophaga	0	0	0	0	0	0	0	0	0	0	0	0	0	0	0	0	0	0	0
	k__Bacteria;p__Bacteroidetes;c__Sphingobacteriia;o__Sphingobacteriales;f__Chitinophagaceae;g__Flavisolibacter	0	0	0	0	0	0	0	0	0	0	0	0	0	0	0	0	0	0	0
	k__Bacteria;p__Bacteroidetes;c__Sphingobacteriia;o__Sphingobacteriales;f__Ekhidnaceae;g__	0	0	0	0	0	0	0	0	0	0	0	0	0	0	0	0	0	0	0
	k__Bacteria;p__Bacteroidetes;c__Sphingobacteriia;o__Sphingobacteriales;f__Flammeovirgaceae;Other	0	0	0	0	0	0	0	0	0	0	0	0	0	0	0	0	0	0	0
	k__Bacteria;p__Bacteroidetes;c__Sphingobacteriia;o__Sphingobacteriales;f__Flammeovirgaceae;g__A4	0	0	0.001	0.001	0	0	0	0	0	0	0	0	0	0	0	0	0	0	0
	k__Bacteria;p__Bacteroidetes;c__Sphingobacteriia;o__Sphingobacteriales;f__Flammeovirgaceae;g__Rapidithrix	0	0	0	0	0	0	0	0	0	0	0	0	0	0	0	0	0	0	0
	k__Bacteria;p__Bacteroidetes;c__Sphingobacteriia;o__Sphingobacteriales;f__Flexibacteraceae;Other	0	0	0	0	0	0	0	0	0	0	0	0	0	0	0	0	0	0	0
	k__Bacteria;p__Bacteroidetes;c__Sphingobacteriia;o__Sphingobacteriales;f__Flexibacteraceae;g__	0	0	0.001	0	0	0	0	0	0	0	0	0	0	0	0	0	0	0	0
	k__Bacteria;p__Bacteroidetes;c__Sphingobacteriia;o__Sphingobacteriales;f__Flexibacteraceae;g__Arcicella	0	0	0	0.002	0	0	0	0	0	0	0	0	0	0	0	0	0	0	0
	k__Bacteria;p__Bacteroidetes;c__Sphingobacteriia;o__Sphingobacteriales;f__Flexibacteraceae;g__Dyadobacter	0	0	0	0	0	0	0	0	0	0	0	0	0	0	0	0	0	0	0
	k__Bacteria;p__Bacteroidetes;c__Sphingobacteriia;o__Sphingobacteriales;f__Flexibacteraceae;g__Emticicia	0	0	0	0	0	0	0	0	0	0	0	0	0	0	0	0	0	0	0
	k__Bacteria;p__Bacteroidetes;c__Sphingobacteriia;o__Sphingobacteriales;f__Flexibacteraceae;g__Flectobacillus	0	0	0	0	0	0	0	0	0	0	0	0	0	0	0	0	0	0	0
	k__Bacteria;p__Bacteroidetes;c__Sphingobacteriia;o__Sphingobacteriales;f__Flexibacteraceae;g__Hymenobacter	0	0	0	0	0	0	0	0	0	0	0	0	0	0	0	0	0	0	0
	k__Bacteria;p__Bacteroidetes;c__Sphingobacteriia;o__Sphingobacteriales;f__Flexibacteraceae;g__Spirosoma	0	0	0	0	0	0	0	0	0	0	0	0	0	0	0	0	0	0	0
	k__Bacteria;p__Bacteroidetes;c__Sphingobacteriia;o__Sphingobacteriales;f__Saprospiraceae;Other	0	0	0	0	0	0	0	0	0	0	0	0	0	0	0	0	0	0	0
	k__Bacteria;p__Bacteroidetes;c__Sphingobacteriia;o__Sphingobacteriales;f__Saprospiraceae;g__	0	0	0.001	0	0	0	0	0	0	0	0	0	0	0	0	0	0	0	0
	k__Bacteria;p__Bacteroidetes;c__Sphingobacteriia;o__Sphingobacteriales;f__Sphingobacteriaceae;Other	0	0	0	0	0	0	0.001	0	0	0	0	0	0	0	0	0	0	0	0
	k__Bacteria;p__Bacteroidetes;c__Sphingobacteriia;o__Sphingobacteriales;f__Sphingobacteriaceae;g__	0	0	0.001	0	0	0	0.001	0	0	0	0	0	0	0	0	0	0	0	0
	k__Bacteria;p__Bacteroidetes;c__Sphingobacteriia;o__Sphingobacteriales;f__Sphingobacteriaceae;g__Pedobacter	0	0	0	0	0	0	0	0	0	0	0	0	0	0	0	0	0	0	0
	k__Bacteria;p__Bacteroidetes;c__Sphingobacteriia;o__Sphingobacteriales;f__Sphingobacteriaceae;g__Sphingobacterium	0	0	0	0	0	0	0	0	0	0	0	0	0	0	0	0	0	0	0
	k__Bacteria;p__Bacteroidetes;c__VC2_1_Bac22;o__;f__;g__	0	0	0	0	0	0	0	0	0	0	0	0	0	0	0	0	0	0	0
	k__Bacteria;p__Chlamydiae;c__Chlamydiia;Other;Other;Other	0	0	0	0	0	0	0	0	0	0	0	0	0	0	0	0	0	0	0
	k__Bacteria;p__Chlamydiae;c__Chlamydiia;o__Chlamydiales;Other;Other	0	0	0.002	0.001	0	0	0	0	0	0	0	0	0	0	0	0	0	0	0
	k__Bacteria;p__Chlamydiae;c__Chlamydiia;o__Chlamydiales;f__;g__	0	0	0	0	0	0	0	0	0	0	0	0	0	0	0	0	0	0	0
	k__Bacteria;p__Chlamydiae;c__Chlamydiia;o__Chlamydiales;f__Parachlamydiaceae;Other	0	0	0	0	0	0	0	0	0	0	0	0	0	0	0	0	0	0	0
	k__Bacteria;p__Chlamydiae;c__Chlamydiia;o__Chlamydiales;f__Parachlamydiaceae;g__Candidatus Protochlamydia	0	0	0	0	0	0	0	0	0	0	0	0	0	0	0	0	0	0	0
	k__Bacteria;p__Chlamydiae;c__Chlamydiia;o__Chlamydiales;f__Rhabdochlamydiaceae;g__Candidatus Rhabdochlamydia	0	0	0.002	0.001	0	0	0	0	0	0	0	0	0	0	0	0	0	0	0
	k__Bacteria;p__Chlamydiae;c__Chlamydiia;o__Chlamydiales;f__Simkaniaceae;g__	0	0	0	0	0.001	0	0	0	0	0	0	0	0	0	0	0	0	0	0
	k__Bacteria;p__Chlamydiae;c__Chlamydiia;o__Chlamydiales;f__Waddliaceae;g__	0	0	0	0	0	0	0	0	0	0	0	0	0	0	0	0	0	0	0
	k__Bacteria;p__Chlorobi;Other;Other;Other;Other	0	0	0	0	0	0	0	0	0	0	0	0	0	0	0	0	0	0	0
	k__Bacteria;p__Chlorobi;c__BSV26;o__A89;f__;g__	0	0	0	0	0	0	0	0	0	0	0	0	0	0	0	0	0	0	0
	k__Bacteria;p__Chlorobi;c__BSV26;o__C20;f__;g__	0	0	0.001	0	0	0	0	0	0	0	0	0	0	0	0	0	0	0	0
	k__Bacteria;p__Chlorobi;c__BSV26;o__PK329;f__;g__	0	0	0	0	0	0	0	0	0	0	0	0	0	0	0	0	0	0	0
	k__Bacteria;p__Chlorobi;c__BSV26;o__VC38;f__;g__	0	0	0	0	0	0	0	0	0	0	0	0	0	0	0	0	0	0	0
	k__Bacteria;p__Chlorobi;c__Ignavibacteria;o__Ignavibacteriales;f__;g__	0	0	0	0	0	0	0	0	0	0	0	0	0	0	0	0	0	0	0
	k__Bacteria;p__Chlorobi;c__Ignavibacteria;o__Ignavibacteriales;f__Ignavibacteriaceae;Other	0	0	0	0	0	0	0	0	0	0	0	0	0	0	0	0	0	0	0
	k__Bacteria;p__Chlorobi;c__Ignavibacteria;o__Ignavibacteriales;f__Ignavibacteriaceae;g__	0	0	0	0	0	0	0	0	0	0	0	0	0	0	0	0	0	0	0
	k__Bacteria;p__Chlorobi;c__OPB56;o__;f__;g__	0	0	0	0	0	0	0	0	0	0	0	0	0	0	0	0	0	0	0
	k__Bacteria;p__Chlorobi;c__SJA-28;o__;f__;g__	0	0	0	0	0	0	0	0	0	0	0	0	0	0	0	0	0	0	0
	k__Bacteria;p__Chloroflexi;Other;Other;Other;Other	0	0	0.001	0	0	0	0	0	0	0	0	0	0	0	0	0	0	0	0
	k__Bacteria;p__Chloroflexi;c__Anaerolineae;Other;Other;Other	0	0	0	0	0	0	0	0	0	0	0	0	0	0	0	0	0	0	0
	k__Bacteria;p__Chloroflexi;c__Anaerolineae;o__;f__;g__	0	0	0	0	0	0	0	0	0	0	0	0	0	0	0	0	0	0	0
	k__Bacteria;p__Chloroflexi;c__Anaerolineae;o__A31;f__;g__	0	0	0	0	0	0	0	0	0	0	0	0	0	0	0	0	0	0	0
	k__Bacteria;p__Chloroflexi;c__Anaerolineae;o__A31;f__S47;g__	0	0	0	0	0	0	0	0	0	0	0	0	0	0	0	0	0	0	0
	k__Bacteria;p__Chloroflexi;c__Anaerolineae;o__Anaerolineales;f__Anaerolinaceae;Other	0	0	0	0	0	0	0	0	0	0	0	0	0	0	0	0	0	0	0
	k__Bacteria;p__Chloroflexi;c__Anaerolineae;o__Anaerolineales;f__Anaerolinaceae;g__	0	0	0	0	0	0	0	0	0	0	0	0	0	0	0	0	0	0	0
	k__Bacteria;p__Chloroflexi;c__Anaerolineae;o__Anaerolineales;f__Anaerolinaceae;g__Anaerolinea	0	0	0	0	0	0	0	0	0	0	0	0	0	0	0	0	0	0	0
	k__Bacteria;p__Chloroflexi;c__Anaerolineae;o__CFB-26;f__;g__	0	0	0	0	0	0	0	0	0	0	0	0	0	0	0	0	0	0	0
	k__Bacteria;p__Chloroflexi;c__Anaerolineae;o__Caldilineales;f__Caldilineaceae;g__Caldilinea	0	0	0	0	0	0	0	0	0	0	0	0	0	0	0	0	0	0	0
	k__Bacteria;p__Chloroflexi;c__Anaerolineae;o__GCA004;f__;g__	0	0	0.001	0	0	0	0	0	0	0	0	0	0	0	0	0	0	0	0
	k__Bacteria;p__Chloroflexi;c__Anaerolineae;o__H39;f__;g__	0	0	0	0	0	0	0	0	0	0	0	0	0	0	0	0	0	0	0
	k__Bacteria;p__Chloroflexi;c__Anaerolineae;o__S0208;f__;g__	0	0	0	0	0	0	0	0	0	0	0	0	0	0	0	0	0	0	0
	k__Bacteria;p__Chloroflexi;c__Anaerolineae;o__SB-34;f__;g__	0	0	0	0	0	0	0	0	0	0	0	0	0	0	0	0	0	0	0
	k__Bacteria;p__Chloroflexi;c__Anaerolineae;o__SBR1031;Other;Other	0	0	0	0	0	0	0	0	0	0	0	0	0	0	0	0	0	0	0
	k__Bacteria;p__Chloroflexi;c__Anaerolineae;o__SBR1031;f__A4b;g__	0	0	0	0	0	0	0	0	0	0	0	0	0	0	0	0	0	0	0
	k__Bacteria;p__Chloroflexi;c__Anaerolineae;o__SHA-20;f__;g__	0	0	0	0	0	0	0	0	0	0	0	0	0	0	0	0	0	0	0
	k__Bacteria;p__Chloroflexi;c__Anaerolineae;o__SJA-15;f__;g__	0	0	0	0	0	0	0	0	0	0	0	0	0	0	0	0	0	0	0
	k__Bacteria;p__Chloroflexi;c__Anaerolineae;o__WCHB1-50;f__;g__	0	0	0	0	0	0	0	0	0	0	0	0	0	0	0	0	0	0	0
	k__Bacteria;p__Chloroflexi;c__Anaerolineae;o__envOPS12;f__;g__	0	0	0	0	0	0	0	0	0	0	0	0	0	0	0	0	0	0	0
	k__Bacteria;p__Chloroflexi;c__Anaerolineae;o__pLW-97;f__;g__	0	0	0	0	0	0	0	0	0	0	0	0	0	0	0	0	0	0	0
	k__Bacteria;p__Chloroflexi;c__Bljii12;o__AKYG885;f__Dolo_23;g__	0	0	0	0	0	0	0	0	0	0	0	0	0	0	0	0	0	0	0
	k__Bacteria;p__Chloroflexi;c__Chloroflexi;o__Roseiflexales;f__;g__	0	0	0	0	0	0	0	0	0	0	0	0	0	0	0	0	0	0	0
	k__Bacteria;p__Chloroflexi;c__Chloroflexi;o__Roseiflexales;f__Kouleothrixaceae;g__	0	0	0	0	0	0	0	0	0	0	0	0	0	0	0	0	0	0	0
	k__Bacteria;p__Chloroflexi;c__Chloroflexi;o__Roseiflexales;f__Kouleothrixaceae;g__Kouleothrix	0	0	0	0	0	0	0	0	0	0	0	0	0	0	0	0	0	0	0
	k__Bacteria;p__Chloroflexi;c__Dehalococcoidetes;Other;Other;Other	0	0	0	0	0	0	0	0	0	0	0	0	0	0	0	0	0	0	0
	k__Bacteria;p__Chloroflexi;c__Dehalococcoidetes;o__;f__;g__	0	0	0	0	0	0	0	0	0	0	0	0	0	0	0	0	0	0	0
	k__Bacteria;p__Chloroflexi;c__Dehalococcoidetes;o__Dehalococcoidales;f__Dehalococcoidaceae;g__	0	0	0	0	0	0	0	0	0	0	0	0	0	0	0	0	0	0	0
	k__Bacteria;p__Chloroflexi;c__Ellin6529;o__;f__;g__	0	0	0.001	0	0	0	0	0	0	0	0	0	0	0	0	0	0	0	0
	k__Bacteria;p__Chloroflexi;c__Ktedonobacteria;o__Ktedonobacterales;f__Ktedonobacteraceae;g__FFCH10602	0	0	0	0	0	0	0	0	0	0	0	0	0	0	0	0	0	0	0
	k__Bacteria;p__Chloroflexi;c__S085;o__;f__;g__	0	0	0	0	0	0	0	0	0	0	0	0	0	0	0	0	0	0	0
	k__Bacteria;p__Chloroflexi;c__TK17;o__S085;f__;g__	0	0	0	0	0	0	0	0	0	0	0	0	0	0	0	0	0	0	0
	k__Bacteria;p__Chloroflexi;c__TK17;o__mle1-48;f__;g__	0	0	0	0	0	0	0	0	0	0	0	0	0	0	0	0	0	0	0
	k__Bacteria;p__Chloroflexi;c__Thermomicrobia;o__JG30-KF-CM45;f__;g__	0	0	0	0	0	0	0	0	0	0	0	0	0	0	0	0	0	0	0
	k__Bacteria;p__Cyanobacteria;Other;Other;Other;Other	0	0	0	0	0	0	0	0	0	0	0	0	0	0	0	0	0	0	0
	k__Bacteria;p__Cyanobacteria;c__4C0d-2;Other;Other;Other	0	0	0	0	0	0	0	0	0	0	0	0	0	0	0	0	0	0	0
	k__Bacteria;p__Cyanobacteria;c__4C0d-2;o__MLE1-12;f__;g__	0	0	0	0	0	0	0	0	0	0	0	0	0	0	0	0	0	0	0
	k__Bacteria;p__Cyanobacteria;c__4C0d-2;o__SM1D11;f__;g__	0	0	0.001	0	0	0	0	0	0	0	0	0	0	0	0	0	0	0	0
	k__Bacteria;p__Cyanobacteria;c__4C0d-2;o__YS2;f__;g__	0	0	0.001	0	0	0	0	0	0	0	0	0	0	0	0	0	0	0	0
	k__Bacteria;p__Cyanobacteria;c__Chloroplast;o__Chlorophyta;f__;g__	0	0	0	0	0	0	0	0	0	0	0	0	0	0	0	0	0	0	0
	k__Bacteria;p__Cyanobacteria;c__Chloroplast;o__Chlorophyta;f__Trebouxiophyceae;g__	0	0	0	0	0	0	0	0	0	0	0	0	0	0	0	0	0	0	0
	k__Bacteria;p__Cyanobacteria;c__Chloroplast;o__Cryptophyta;f__;g__	0	0	0	0.002	0	0	0	0	0	0	0	0	0	0	0	0	0	0	0
	k__Bacteria;p__Cyanobacteria;c__Chloroplast;o__Euglenozoa;f__;g__	0	0	0	0	0	0	0	0	0	0	0	0	0	0	0	0	0	0	0
	k__Bacteria;p__Cyanobacteria;c__Chloroplast;o__Stramenopiles;f__;g__	0	0	0.002	0.003	0	0	0	0	0	0	0	0	0	0	0	0	0	0	0
	k__Bacteria;p__Cyanobacteria;c__Chloroplast;o__Streptophyta;f__;g__	0	0.013	0	0.001	0.221	0	0.001	0	0.002	0.001	0	0.002	0.002	0	0.002	0.001	0	0	0.001
	k__Bacteria;p__Cyanobacteria;c__Nostocophycideae;o__Nostocales;f__Nostocaceae;Other	0	0	0	0	0	0	0	0	0	0	0	0	0	0	0	0	0	0	0
	k__Bacteria;p__Cyanobacteria;c__Nostocophycideae;o__Stigonematales;f__Rivulariaceae;g__Calothrix	0	0	0	0	0	0	0	0	0	0	0	0	0	0	0	0	0	0	0
	k__Bacteria;p__Cyanobacteria;c__Oscillatoriophycideae;o__;f__;g__	0	0	0	0	0	0	0	0	0	0	0	0	0	0	0	0	0	0	0
	k__Bacteria;p__Cyanobacteria;c__Oscillatoriophycideae;o__Chroococcales;Other;Other	0	0	0	0	0	0	0	0	0	0	0	0	0	0	0	0	0	0	0
	k__Bacteria;p__Cyanobacteria;c__Oscillatoriophycideae;o__Chroococcales;f__Phormidiaceae;g__Phormidium	0	0	0	0	0	0	0	0	0	0	0	0	0	0	0	0	0	0	0
	k__Bacteria;p__Cyanobacteria;c__Oscillatoriophycideae;o__Chroococcales;f__Xenococcaceae;Other	0	0	0	0	0	0	0	0	0	0	0	0	0	0	0	0	0	0	0
	k__Bacteria;p__Cyanobacteria;c__Oscillatoriophycideae;o__Oscillatoriales;f__Phormidiaceae;g__Phormidium	0	0	0	0	0	0	0	0	0	0	0	0	0	0	0	0	0	0	0
	k__Bacteria;p__Cyanobacteria;c__S15B-MN24;o__;f__;g__	0	0	0	0	0	0	0	0	0	0	0	0	0	0	0	0	0	0	0
	k__Bacteria;p__Cyanobacteria;c__Synechococcophycideae;o__Pseudanabaenales;f__Pseudanabaenaceae;g__Leptolyngbya	0	0	0	0	0	0	0	0	0	0	0	0	0	0	0	0	0	0	0
	k__Bacteria;p__Cyanobacteria;c__Synechococcophycideae;o__Synechococcales;f__Chamaesiphonaceae;g__	0	0	0	0	0	0	0	0	0	0	0	0	0	0	0	0	0	0	0
	k__Bacteria;p__Deferribacteres;c__Deferribacteres;o__Deferribacterales;f__Deferribacteraceae;Other	0	0	0	0	0	0	0	0	0	0	0	0	0	0	0	0	0	0	0
	k__Bacteria;p__Deferribacteres;c__Deferribacteres;o__Deferribacterales;f__Deferribacteraceae;g__Mucispirillum	0	0	0	0	0	0	0	0	0	0	0	0	0	0	0	0	0	0	0
	k__Bacteria;p__Elusimicrobia;Other;Other;Other;Other	0	0	0.001	0	0	0	0	0	0	0	0	0	0	0	0	0	0	0	0
	k__Bacteria;p__Elusimicrobia;c__Elusimicrobia;Other;Other;Other	0	0	0	0	0	0	0	0	0	0	0	0	0	0	0	0	0	0	0
	k__Bacteria;p__Elusimicrobia;c__Elusimicrobia;o__Elusimicrobiales;f__;g__	0	0	0.001	0	0	0	0	0	0	0	0	0	0	0	0	0	0	0	0
	k__Bacteria;p__Elusimicrobia;c__Elusimicrobia;o__Elusimicrobiales;f__Elusimicrobiaceae;g__Elusimicrobium	0	0	0	0	0	0	0	0	0	0	0	0	0	0	0	0	0	0	0
	k__Bacteria;p__Elusimicrobia;c__Elusimicrobia;o__FAC88;f__;g__	0	0	0.002	0	0	0	0	0	0	0	0	0	0	0	0	0	0	0	0
	k__Bacteria;p__Elusimicrobia;c__Elusimicrobia;o__IIb;f__;g__	0	0	0.001	0	0	0	0	0	0	0	0	0	0	0	0	0	0	0	0
	k__Bacteria;p__Elusimicrobia;c__Elusimicrobia;o__MVP-88;f__;g__	0	0	0.001	0	0	0	0	0	0	0	0	0	0	0	0	0	0	0	0
	k__Bacteria;p__Elusimicrobia;c__Endomicrobia;o__;f__;g__	0	0	0.002	0.001	0	0	0	0	0	0	0	0	0	0	0	0	0	0	0
	k__Bacteria;p__Elusimicrobia;c__OP2;o__;f__;g__	0	0	0	0	0	0	0	0	0	0	0	0	0	0	0	0	0	0	0
	k__Bacteria;p__FCPU426;c__;o__;f__;g__	0	0	0	0	0	0	0	0	0	0	0	0	0	0	0	0	0	0	0
	k__Bacteria;p__Fibrobacteres;Other;Other;Other;Other	0	0	0	0	0	0	0	0	0	0	0	0	0	0	0	0	0	0	0
	k__Bacteria;p__Fibrobacteres;c__Fibrobacteria;Other;Other;Other	0	0	0	0	0	0	0	0	0	0	0	0	0	0	0	0	0	0	0
	k__Bacteria;p__Fibrobacteres;c__Fibrobacteria;o__258ds10;f__;g__	0	0	0	0	0	0	0	0	0	0	0	0	0	0	0	0	0	0	0
	k__Bacteria;p__Fibrobacteres;c__Fibrobacteria;o__Fibrobacterales;f__Fibrobacteraceae;Other	0	0	0	0	0	0	0	0	0	0	0	0	0	0	0	0	0	0	0
	k__Bacteria;p__Fibrobacteres;c__Fibrobacteria;o__Fibrobacterales;f__Fibrobacteraceae;g__	0	0	0	0	0	0	0	0	0	0	0	0	0	0	0	0	0	0	0
	k__Bacteria;p__Fibrobacteres;c__Fibrobacteria;o__Ucp1540;f__;g__	0	0	0	0	0	0	0	0	0	0	0	0	0	0	0	0	0	0	0
	k__Bacteria;p__Fibrobacteres;c__SBZC_2415;o__;f__;g__	0	0	0	0	0	0	0	0	0	0	0	0	0	0	0	0	0	0	0
	k__Bacteria;p__Fibrobacteres;c__TG3;Other;Other;Other	0	0	0	0	0	0	0	0	0	0	0	0	0	0	0	0	0	0	0
	k__Bacteria;p__Fibrobacteres;c__TG3;o__TG3-1;Other;Other	0	0	0	0	0	0	0	0	0	0	0	0	0	0	0	0	0	0	0
	k__Bacteria;p__Fibrobacteres;c__TG3;o__TG3-1;f__;g__	0	0	0	0	0	0	0	0	0	0	0	0	0	0	0	0	0	0	0
	k__Bacteria;p__Fibrobacteres;c__TG3;o__TG3-1;f__B122;g__	0	0	0	0	0	0	0	0	0	0	0	0	0	0	0	0	0	0	0
	k__Bacteria;p__Fibrobacteres;c__TG3;o__TG3-1;f__TSCOR003-O20;g__	0	0	0	0	0	0	0	0	0	0	0	0	0	0	0	0	0	0	0
	k__Bacteria;p__Fibrobacteres;c__TG3;o__TG3-2;f__;g__	0	0	0	0	0	0	0	0	0	0	0	0	0	0	0	0	0	0	0
	k__Bacteria;p__Firmicutes;Other;Other;Other;Other	0	0	0	0	0	0	0	0	0	0	0	0	0	0	0	0	0	0	0
	k__Bacteria;p__Firmicutes;c__Bacilli;Other;Other;Other	0	0.001	0	0	0.011	0	0	0	0	0	0	0	0	0	0	0	0	0	0
	k__Bacteria;p__Firmicutes;c__Bacilli;o__;f__;g__	0	0	0	0	0.002	0	0	0	0	0	0	0	0	0	0	0	0	0	0
	k__Bacteria;p__Firmicutes;c__Bacilli;o__Bacillales;Other;Other	0	0	0	0	0.007	0	0	0	0	0	0	0	0	0	0	0	0	0	0
	k__Bacteria;p__Firmicutes;c__Bacilli;o__Bacillales;f__Alicyclobacillaceae;g__Alicyclobacillus	0	0	0	0	0	0	0	0	0	0	0	0	0	0	0	0	0	0	0
	k__Bacteria;p__Firmicutes;c__Bacilli;o__Bacillales;f__Bacillaceae;Other	0	0	0	0	0.001	0	0	0	0	0	0	0	0	0	0	0	0	0	0
	k__Bacteria;p__Firmicutes;c__Bacilli;o__Bacillales;f__Bacillaceae;g__Alkalibacillus	0	0	0	0	0	0	0	0	0	0	0	0	0	0	0	0	0	0	0
	k__Bacteria;p__Firmicutes;c__Bacilli;o__Bacillales;f__Bacillaceae;g__Bacillus	1	0.034	0	0	0.643	0	0	0	0	0	0	0	0	0	0	0	0	0	0
	k__Bacteria;p__Firmicutes;c__Bacilli;o__Bacillales;f__Bacillaceae;g__Geobacillus	0	0	0	0	0	0	0	0	0	0	0	0	0	0	0	0	0	0	0
	k__Bacteria;p__Firmicutes;c__Bacilli;o__Bacillales;f__Listeriaceae;g__Brochothrix	0	0	0	0	0	0	0	0	0	0	0	0	0	0	0	0	0	0	0
	k__Bacteria;p__Firmicutes;c__Bacilli;o__Bacillales;f__Paenibacillaceae;Other	0	0	0	0	0	0	0	0	0	0	0	0	0	0	0	0	0	0	0
	k__Bacteria;p__Firmicutes;c__Bacilli;o__Bacillales;f__Paenibacillaceae;g__	0	0	0	0	0	0	0	0	0	0	0	0	0	0	0	0	0	0	0
	k__Bacteria;p__Firmicutes;c__Bacilli;o__Bacillales;f__Paenibacillaceae;g__Brevibacillus	0	0	0	0	0	0	0	0	0	0	0	0	0	0	0	0	0	0	0
	k__Bacteria;p__Firmicutes;c__Bacilli;o__Bacillales;f__Paenibacillaceae;g__Paenibacillus	0	0	0	0	0	0	0	0	0	0	0	0	0	0	0	0	0	0	0
	k__Bacteria;p__Firmicutes;c__Bacilli;o__Bacillales;f__Planococcaceae;Other	0	0	0	0	0	0	0	0	0	0	0	0	0	0	0	0	0	0	0
	k__Bacteria;p__Firmicutes;c__Bacilli;o__Bacillales;f__Planococcaceae;g__Solibacillus	0	0	0	0	0	0	0	0	0	0	0	0	0	0	0	0	0	0	0
	k__Bacteria;p__Firmicutes;c__Bacilli;o__Bacillales;f__Planococcaceae;g__Sporosarcina	0	0	0	0	0.002	0	0	0	0	0	0	0	0	0	0	0	0	0	0
	k__Bacteria;p__Firmicutes;c__Bacilli;o__Bacillales;f__Staphylococcaceae;Other	0	0	0	0	0.002	0	0	0	0	0	0	0	0	0	0	0	0	0	0
	k__Bacteria;p__Firmicutes;c__Bacilli;o__Bacillales;f__Staphylococcaceae;g__Jeotgalicoccus	0	0	0	0	0	0	0	0	0	0	0	0	0	0	0	0	0	0	0
	k__Bacteria;p__Firmicutes;c__Bacilli;o__Bacillales;f__Staphylococcaceae;g__Staphylococcus	0	0.001	0	0.001	0.02	0	0	0	0	0	0	0	0	0.001	0	0.001	0	0	0
	k__Bacteria;p__Firmicutes;c__Bacilli;o__Bacillales;f__Thermoactinomycetaceae;g__	0	0	0	0	0	0	0	0	0	0	0	0	0	0	0	0	0	0	0
	k__Bacteria;p__Firmicutes;c__Bacilli;o__Exiguobacterales;f__Exiguobacteraceae;Other	0	0	0	0	0	0	0	0	0	0	0	0	0	0	0	0	0	0	0
	k__Bacteria;p__Firmicutes;c__Bacilli;o__Exiguobacterales;f__Exiguobacteraceae;g__Exiguobacterium	0	0	0	0	0	0	0	0	0	0	0	0	0	0	0	0	0	0	0
	k__Bacteria;p__Firmicutes;c__Bacilli;o__Gemellales;Other;Other	0	0	0	0	0	0	0	0	0	0	0	0	0	0	0	0	0	0	0
	k__Bacteria;p__Firmicutes;c__Bacilli;o__Gemellales;f__Gemellaceae;Other	0	0	0	0	0	0	0	0	0	0	0	0	0	0	0	0	0	0	0
	k__Bacteria;p__Firmicutes;c__Bacilli;o__Gemellales;f__Gemellaceae;g__	0	0	0	0	0	0	0	0	0	0	0	0	0	0	0	0	0	0	0
	k__Bacteria;p__Firmicutes;c__Bacilli;o__Lactobacillales;Other;Other	0	0.004	0	0	0.002	0.002	0	0.009	0.002	0	0.003	0.002	0	0.002	0	0.001	0.003	0.004	0.001
	k__Bacteria;p__Firmicutes;c__Bacilli;o__Lactobacillales;f__Aerococcaceae;g__Abiotrophia	0	0	0	0	0	0	0	0	0	0	0	0	0	0	0	0	0	0	0
	k__Bacteria;p__Firmicutes;c__Bacilli;o__Lactobacillales;f__Aerococcaceae;g__Aerococcus	0	0	0	0	0	0	0	0	0	0	0	0	0	0	0	0	0	0	0
	k__Bacteria;p__Firmicutes;c__Bacilli;o__Lactobacillales;f__Aerococcaceae;g__Alloiococcus	0	0	0	0	0.001	0	0	0	0	0	0	0	0	0	0	0	0	0	0
	k__Bacteria;p__Firmicutes;c__Bacilli;o__Lactobacillales;f__Aerococcaceae;g__Facklamia	0	0	0	0	0	0	0	0	0	0	0	0	0	0	0	0	0	0	0
	k__Bacteria;p__Firmicutes;c__Bacilli;o__Lactobacillales;f__Carnobacteriaceae;Other	0	0	0	0	0	0	0	0	0	0	0	0	0	0	0	0	0	0	0
	k__Bacteria;p__Firmicutes;c__Bacilli;o__Lactobacillales;f__Carnobacteriaceae;g__Granulicatella	0	0	0	0	0	0	0	0	0	0	0	0	0	0	0	0	0	0	0
	k__Bacteria;p__Firmicutes;c__Bacilli;o__Lactobacillales;f__Enterococcaceae;Other	0	0	0	0	0	0	0	0	0	0	0	0	0	0	0	0	0	0	0
	k__Bacteria;p__Firmicutes;c__Bacilli;o__Lactobacillales;f__Enterococcaceae;g__	0	0	0	0	0	0	0	0	0	0	0	0	0	0	0	0	0	0	0
	k__Bacteria;p__Firmicutes;c__Bacilli;o__Lactobacillales;f__Lactobacillaceae;Other	0	0.001	0	0	0	0	0	0.001	0.001	0	0.001	0	0	0	0	0.001	0.001	0.001	0
	k__Bacteria;p__Firmicutes;c__Bacilli;o__Lactobacillales;f__Lactobacillaceae;g__	0	0	0	0	0	0	0	0	0	0	0	0	0	0	0	0	0	0	0
	k__Bacteria;p__Firmicutes;c__Bacilli;o__Lactobacillales;f__Lactobacillaceae;g__Lactobacillus	14	0.748	0	0.009	0.015	0.897	0.943	0.813	0.947	0.948	0.965	0.965	0.914	0.959	0.886	0.953	0.966	0.84	0.981
	k__Bacteria;p__Firmicutes;c__Bacilli;o__Lactobacillales;f__Leuconostocaceae;Other	0	0	0	0	0	0	0	0.001	0	0	0	0.001	0	0	0	0	0	0	0
	k__Bacteria;p__Firmicutes;c__Bacilli;o__Lactobacillales;f__Leuconostocaceae;g__	0	0	0	0	0	0	0	0	0	0	0	0	0	0	0	0	0	0	0
	k__Bacteria;p__Firmicutes;c__Bacilli;o__Lactobacillales;f__Leuconostocaceae;g__Leuconostoc	0	0	0	0	0	0	0	0.003	0	0	0	0	0	0	0	0	0	0	0
	k__Bacteria;p__Firmicutes;c__Bacilli;o__Lactobacillales;f__Leuconostocaceae;g__Weissella	0	0	0	0	0	0	0	0.001	0	0	0	0.001	0	0	0	0	0	0	0
	k__Bacteria;p__Firmicutes;c__Bacilli;o__Lactobacillales;f__Streptococcaceae;Other	0	0.007	0	0	0.001	0.001	0.001	0.009	0.002	0	0.001	0.001	0	0	0	0.001	0.002	0.004	0
	k__Bacteria;p__Firmicutes;c__Bacilli;o__Lactobacillales;f__Streptococcaceae;g__	0	0.002	0	0	0	0	0	0.006	0.001	0	0.003	0.001	0	0.004	0	0.001	0.002	0.002	0.002
	k__Bacteria;p__Firmicutes;c__Bacilli;o__Lactobacillales;f__Streptococcaceae;g__Lactococcus	0	0	0.002	0	0	0	0	0.004	0	0	0	0	0	0	0	0	0	0	0
	k__Bacteria;p__Firmicutes;c__Bacilli;o__Lactobacillales;f__Streptococcaceae;g__Streptococcus	1	0.029	0	0.001	0.003	0.001	0.003	0.02	0.005	0.001	0.006	0.001	0.001	0.002	0.001	0.001	0.006	0.008	0.002
	k__Bacteria;p__Firmicutes;c__Bacilli;o__Turicibacterales;f__Turicibacteraceae;g__Turicibacter	0	0	0	0	0	0	0	0	0	0	0	0	0	0	0	0	0	0	0
	k__Bacteria;p__Firmicutes;c__Clostridia;Other;Other;Other	0	0	0.001	0.001	0	0	0	0	0	0	0	0	0	0	0	0	0	0	0
	k__Bacteria;p__Firmicutes;c__Clostridia;o__;f__;g__	0	0	0	0	0	0	0	0	0	0	0	0	0	0	0	0	0	0	0
	k__Bacteria;p__Firmicutes;c__Clostridia;o__Clostridiales;Other;Other	0	0	0.001	0	0	0	0	0	0	0	0	0	0	0	0	0	0	0	0
	k__Bacteria;p__Firmicutes;c__Clostridia;o__Clostridiales;f__;g__	0	0	0	0	0	0	0	0	0	0	0	0	0	0	0	0	0	0	0
	k__Bacteria;p__Firmicutes;c__Clostridia;o__Clostridiales;f__Catabacteriaceae;g__	0	0	0	0	0	0	0	0	0	0	0	0	0	0	0	0	0	0	0
	k__Bacteria;p__Firmicutes;c__Clostridia;o__Clostridiales;f__Christensenellaceae;g__	0	0	0	0	0	0	0	0	0	0	0	0	0	0	0	0	0	0	0
	k__Bacteria;p__Firmicutes;c__Clostridia;o__Clostridiales;f__Clostridiaceae;Other	0	0	0	0	0	0	0	0	0	0	0	0	0	0	0	0	0	0	0
	k__Bacteria;p__Firmicutes;c__Clostridia;o__Clostridiales;f__Clostridiaceae;g__	0	0	0	0	0	0	0	0	0	0	0	0	0	0	0	0	0	0	0
	k__Bacteria;p__Firmicutes;c__Clostridia;o__Clostridiales;f__Clostridiaceae;g__Anaerococcus	0	0	0	0	0	0	0	0	0	0	0	0	0	0	0	0	0	0	0
	k__Bacteria;p__Firmicutes;c__Clostridia;o__Clostridiales;f__Clostridiaceae;g__Caloramator	0	0	0	0	0	0	0	0	0	0	0	0	0	0	0	0	0	0	0
	k__Bacteria;p__Firmicutes;c__Clostridia;o__Clostridiales;f__Clostridiaceae;g__Clostridium	0	0	0.003	0.001	0	0	0	0	0	0	0	0	0	0	0	0	0	0	0
	k__Bacteria;p__Firmicutes;c__Clostridia;o__Clostridiales;f__Clostridiaceae;g__Finegoldia	0	0	0	0	0	0	0	0	0	0	0	0	0	0	0	0	0	0	0
	k__Bacteria;p__Firmicutes;c__Clostridia;o__Clostridiales;f__Clostridiaceae;g__Peptoniphilus	0	0	0	0	0	0	0	0	0	0	0	0	0	0	0	0	0	0	0
	k__Bacteria;p__Firmicutes;c__Clostridia;o__Clostridiales;f__Dehalobacteriaceae;g__	0	0	0	0	0	0	0	0	0	0	0	0	0	0	0	0	0	0	0
	k__Bacteria;p__Firmicutes;c__Clostridia;o__Clostridiales;f__Dehalobacteriaceae;g__Dehalobacterium	0	0	0	0	0	0	0	0	0	0	0	0	0	0	0	0	0	0	0
	k__Bacteria;p__Firmicutes;c__Clostridia;o__Clostridiales;f__Eubacteriaceae;Other	0	0	0	0	0	0	0	0	0	0	0	0	0	0	0	0	0	0	0
	k__Bacteria;p__Firmicutes;c__Clostridia;o__Clostridiales;f__Lachnospiraceae;Other	0	0	0.001	0	0	0	0	0	0	0	0	0	0	0	0	0	0	0	0
	k__Bacteria;p__Firmicutes;c__Clostridia;o__Clostridiales;f__Lachnospiraceae;g__	0	0	0	0	0	0	0	0	0	0	0	0	0	0	0	0	0	0	0
	k__Bacteria;p__Firmicutes;c__Clostridia;o__Clostridiales;f__Peptococcaceae;Other	0	0	0	0	0	0	0	0	0	0	0	0	0	0	0	0	0	0	0
	k__Bacteria;p__Firmicutes;c__Clostridia;o__Clostridiales;f__Peptococcaceae;g__	0	0	0	0	0	0	0	0	0	0	0	0	0	0	0	0	0	0	0
	k__Bacteria;p__Firmicutes;c__Clostridia;o__Clostridiales;f__Peptococcaceae;g__Dehalobacter	0	0	0	0	0	0	0	0	0	0	0	0	0	0	0	0	0	0	0
	k__Bacteria;p__Firmicutes;c__Clostridia;o__Clostridiales;f__Peptococcaceae;g__Desulfurispora	0	0	0	0	0	0	0	0	0	0	0	0	0	0	0	0	0	0	0
	k__Bacteria;p__Firmicutes;c__Clostridia;o__Clostridiales;f__Peptostreptococcaceae;Other	0	0	0	0	0	0	0	0	0	0	0	0	0	0	0	0	0	0	0
	k__Bacteria;p__Firmicutes;c__Clostridia;o__Clostridiales;f__Peptostreptococcaceae;g__	0	0	0	0	0	0	0	0	0	0	0	0	0	0	0	0	0	0	0
	k__Bacteria;p__Firmicutes;c__Clostridia;o__Clostridiales;f__Ruminococcaceae;Other	0	0	0.001	0	0	0	0	0	0	0	0	0	0	0	0	0	0	0	0
	k__Bacteria;p__Firmicutes;c__Clostridia;o__Clostridiales;f__Ruminococcaceae;g__	0	0	0	0	0	0	0	0	0	0	0	0	0	0	0	0	0	0	0
	k__Bacteria;p__Firmicutes;c__Clostridia;o__Clostridiales;f__Ruminococcaceae;g__Ruminococcus	0	0	0	0	0	0	0	0	0	0	0	0	0	0	0	0	0	0	0
	k__Bacteria;p__Firmicutes;c__Clostridia;o__Clostridiales;f__Syntrophomonadaceae;g__Syntrophomonas	0	0	0	0	0	0	0	0	0	0	0	0	0	0	0	0	0	0	0
	k__Bacteria;p__Firmicutes;c__Clostridia;o__Clostridiales;f__Veillonellaceae;Other	0	0	0.001	0	0	0	0	0	0	0	0	0	0	0	0	0	0	0	0
	k__Bacteria;p__Firmicutes;c__Clostridia;o__Clostridiales;f__Veillonellaceae;g__	0	0	0	0	0	0	0	0	0	0	0	0	0	0	0	0	0	0	0
	k__Bacteria;p__Firmicutes;c__Clostridia;o__Clostridiales;f__Veillonellaceae;g__Anaerovibrio	0	0	0	0	0	0	0	0	0	0	0	0	0	0	0	0	0	0	0
	k__Bacteria;p__Firmicutes;c__Clostridia;o__Clostridiales;f__Veillonellaceae;g__Desulfosporomusa	0	0	0	0	0	0	0	0	0	0	0	0	0	0	0	0	0	0	0
	k__Bacteria;p__Firmicutes;c__Clostridia;o__Clostridiales;f__Veillonellaceae;g__Megasphaera	0	0	0	0	0	0	0	0	0	0	0	0	0	0	0	0	0	0	0
	k__Bacteria;p__Firmicutes;c__Clostridia;o__Clostridiales;f__Veillonellaceae;g__Pectinatus	0	0	0	0	0	0	0	0	0	0	0	0	0	0	0	0	0	0	0
	k__Bacteria;p__Firmicutes;c__Clostridia;o__Clostridiales;f__Veillonellaceae;g__Phascolarctobacterium	0	0	0	0	0	0	0	0	0	0	0	0	0	0	0	0	0	0	0
	k__Bacteria;p__Firmicutes;c__Clostridia;o__Clostridiales;f__Veillonellaceae;g__Thermosinus	0	0	0	0	0	0	0	0	0	0	0	0	0	0	0	0	0	0	0
	k__Bacteria;p__Firmicutes;c__Clostridia;o__Clostridiales;f__Veillonellaceae;g__Veillonella	0	0	0	0	0.001	0	0	0	0	0	0	0	0	0	0	0	0	0	0
	k__Bacteria;p__Firmicutes;c__Clostridia;o__Coriobacteriales;f__Coriobacteriaceae;g__	0	0	0.001	0.001	0	0	0	0	0	0	0	0	0	0	0	0	0	0	0
	k__Bacteria;p__Firmicutes;c__Clostridia;o__Coriobacteriales;f__Coriobacteriaceae;g__Atopobium	0	0	0	0	0	0	0	0	0	0	0	0	0	0	0	0	0	0	0
	k__Bacteria;p__Firmicutes;c__Clostridia;o__Desulfitobacterales;f__Desulfitobacteraceae;g__	0	0	0	0	0	0	0	0	0	0	0	0	0	0	0	0	0	0	0
	k__Bacteria;p__Firmicutes;c__Clostridia;o__OPB54;f__;g__	0	0	0	0	0	0	0	0	0	0	0	0	0	0	0	0	0	0	0
	k__Bacteria;p__Firmicutes;c__Erysipelotrichi;o__Erysipelotrichales;f__Erysipelotrichaceae;Other	0	0	0	0	0	0	0	0	0	0	0	0	0	0	0	0	0	0	0
	k__Bacteria;p__Firmicutes;c__Erysipelotrichi;o__Erysipelotrichales;f__Erysipelotrichaceae;g__	0	0	0	0	0	0	0	0	0	0	0	0	0	0	0	0	0	0	0
	k__Bacteria;p__Firmicutes;c__Erysipelotrichi;o__Erysipelotrichales;f__Erysipelotrichaceae;g__PSB-M-3	0	0	0	0	0	0	0	0	0	0	0	0	0	0	0	0	0	0	0
	k__Bacteria;p__Firmicutes;c__Erysipelotrichi;o__Erysipelotrichales;f__[Coprobacillaceae];Other	0	0	0	0	0	0	0	0	0	0	0	0	0	0	0	0	0	0	0
	k__Bacteria;p__Firmicutes;c__Erysipelotrichi;o__Erysipelotrichales;f__[Coprobacillaceae];g__	0	0	0	0	0	0	0	0	0	0	0	0	0	0	0	0	0	0	0
	k__Bacteria;p__Fusobacteria;c__Fusobacteria;o__;f__;g__	0	0	0	0	0	0	0	0	0	0	0	0	0	0	0	0	0	0	0
	k__Bacteria;p__Fusobacteria;c__Fusobacteria;o__Fusobacteriales;Other;Other	0	0	0	0	0	0	0	0	0	0	0	0	0	0	0	0	0	0	0
	k__Bacteria;p__Fusobacteria;c__Fusobacteria;o__Fusobacteriales;f__;g__	0	0	0.001	0.001	0	0	0	0	0	0	0	0	0	0	0	0	0	0	0
	k__Bacteria;p__Fusobacteria;c__Fusobacteria;o__Fusobacteriales;f__Fusobacteriaceae;Other	0	0	0	0	0	0	0	0	0	0	0	0	0	0	0	0	0	0	0
	k__Bacteria;p__Fusobacteria;c__Fusobacteria;o__Fusobacteriales;f__Fusobacteriaceae;g__	0	0	0	0	0	0	0	0	0	0	0	0	0	0	0	0	0	0	0
	k__Bacteria;p__Fusobacteria;c__Fusobacteria;o__Fusobacteriales;f__Fusobacteriaceae;g__Cetobacterium	0	0	0.007	0.001	0	0	0	0	0	0	0	0	0	0	0	0	0	0	0
	k__Bacteria;p__Fusobacteria;c__Fusobacteria;o__Fusobacteriales;f__Fusobacteriaceae;g__Fusobacterium	0	0	0	0	0.001	0	0	0	0	0	0	0	0	0	0	0	0	0	0
	k__Bacteria;p__Fusobacteria;c__Fusobacteria;o__Fusobacteriales;f__Fusobacteriaceae;g__Propionigenium	0	0	0	0	0	0	0	0	0	0	0	0	0	0	0	0	0	0	0
	k__Bacteria;p__Fusobacteria;c__Fusobacteria;o__Fusobacteriales;f__Fusobacteriaceae;g__u114	0	0	0	0	0	0	0	0	0	0	0	0	0	0	0	0	0	0	0
	k__Bacteria;p__Fusobacteria;c__Fusobacteria;o__Fusobacteriales;f__Leptotrichiaceae;Other	0	0	0	0	0	0	0	0	0	0	0	0	0	0	0	0	0	0	0
	k__Bacteria;p__Fusobacteria;c__Fusobacteria;o__Fusobacteriales;f__Leptotrichiaceae;g__Leptotrichia	0	0	0	0	0	0	0	0	0	0	0	0	0	0	0	0	0	0	0
	k__Bacteria;p__Fusobacteria;c__Fusobacteria;o__Fusobacteriales;f__Leptotrichiaceae;g__Sebaldella	0	0	0	0	0	0	0	0	0	0	0	0	0	0	0	0	0	0	0
	k__Bacteria;p__Fusobacteria;c__Fusobacteria;o__Fusobacteriales;f__Leptotrichiaceae;g__Streptobacillus	0	0	0	0	0	0	0	0	0	0	0	0	0	0	0	0	0	0	0
	k__Bacteria;p__GN02;Other;Other;Other;Other	0	0	0	0	0	0	0	0	0	0	0	0	0	0	0	0	0	0	0
	k__Bacteria;p__GN02;c__3BR-5F;o__;f__;g__	0	0	0	0	0	0	0	0	0	0	0	0	0	0	0	0	0	0	0
	k__Bacteria;p__GN02;c__BB34;o__;f__;g__	0	0	0	0	0	0	0	0	0	0	0	0	0	0	0	0	0	0	0
	k__Bacteria;p__GN02;c__BD1-5;o__;f__;g__	0	0	0.001	0	0	0	0	0	0	0	0	0	0	0	0	0	0	0	0
	k__Bacteria;p__GN02;c__GKS2-174;o__;f__;g__	0	0	0	0	0	0	0	0	0	0	0	0	0	0	0	0	0	0	0
	k__Bacteria;p__GN02;c__GN07;o__;f__;g__	0	0	0	0	0	0	0	0	0	0	0	0	0	0	0	0	0	0	0
	k__Bacteria;p__GN04;c__;o__;f__;g__	0	0	0	0	0	0	0	0	0	0	0	0	0	0	0	0	0	0	0
	k__Bacteria;p__GN04;c__GN15;o__;f__;g__	0	0	0	0	0	0	0	0	0	0	0	0	0	0	0	0	0	0	0
	k__Bacteria;p__GOUTA4;c__;o__;f__;g__	0	0	0	0	0	0	0	0	0	0	0	0	0	0	0	0	0	0	0
	k__Bacteria;p__Gemmatimonadetes;c__Gemm-1;o__;f__;g__	0	0	0	0	0	0	0	0	0	0	0	0	0	0	0	0	0	0	0
	k__Bacteria;p__Gemmatimonadetes;c__Gemm-5;o__;f__;g__	0	0	0	0	0	0	0	0	0	0	0	0	0	0	0	0	0	0	0
	k__Bacteria;p__Gemmatimonadetes;c__Gemmatimonadetes;Other;Other;Other	0	0	0	0	0	0	0	0	0	0	0	0	0	0	0	0	0	0	0
	k__Bacteria;p__Gemmatimonadetes;c__Gemmatimonadetes;o__;f__;g__	0	0	0	0	0	0	0	0	0	0	0	0	0	0	0	0	0	0	0
	k__Bacteria;p__Gemmatimonadetes;c__Gemmatimonadetes;o__C114;f__;g__	0	0	0	0	0	0	0	0	0	0	0	0	0	0	0	0	0	0	0
	k__Bacteria;p__Gemmatimonadetes;c__Gemmatimonadetes;o__Ellin5290;f__;g__	0	0	0	0	0	0	0	0	0	0	0	0	0	0	0	0	0	0	0
	k__Bacteria;p__Gemmatimonadetes;c__Gemmatimonadetes;o__Gemmatimonadales;f__A1-B1;g__	0	0	0	0	0	0	0	0	0	0	0	0	0	0	0	0	0	0	0
	k__Bacteria;p__Gemmatimonadetes;c__Gemmatimonadetes;o__KD8-87;f__;g__	0	0	0	0	0	0	0	0	0	0	0	0	0	0	0	0	0	0	0
	k__Bacteria;p__LD1;c__;o__;f__;g__	0	0	0	0	0	0	0	0	0	0	0	0	0	0	0	0	0	0	0
	k__Bacteria;p__Lentisphaerae;c__[Lentisphaeria];Other;Other;Other	0	0	0	0	0	0	0	0	0	0	0	0	0	0	0	0	0	0	0
	k__Bacteria;p__Lentisphaerae;c__[Lentisphaeria];o__Lentisphaerales;f__Arctic95B-10;g__	0	0	0	0	0	0	0	0	0	0	0	0	0	0	0	0	0	0	0
	k__Bacteria;p__Lentisphaerae;c__[Lentisphaeria];o__Victivallales;Other;Other	0	0	0	0	0	0	0	0	0	0	0	0	0	0	0	0	0	0	0
	k__Bacteria;p__Lentisphaerae;c__[Lentisphaeria];o__Victivallales;f__;g__	0	0	0	0	0	0	0	0	0	0	0	0	0	0	0	0	0	0	0
	k__Bacteria;p__Lentisphaerae;c__[Lentisphaeria];o__Victivallales;f__Victivallaceae;g__	0	0	0	0	0	0	0	0	0	0	0	0	0	0	0	0	0	0	0
	k__Bacteria;p__Lentisphaerae;c__[Lentisphaeria];o__Z20;f__;g__	0	0	0	0	0	0	0	0	0	0	0	0	0	0	0	0	0	0	0
	k__Bacteria;p__NC10;c__12-24;o__JH-WHS47;f__;g__	0	0	0	0	0	0	0	0	0	0	0	0	0	0	0	0	0	0	0
	k__Bacteria;p__NC10;c__12-24;o__Methylomirabiliales;f__Methylomirabiliaceae;g__Candidatus Methylomirabilis	0	0	0	0	0	0	0	0	0	0	0	0	0	0	0	0	0	0	0
	k__Bacteria;p__NKB19;c__;o__;f__;g__	0	0	0	0	0	0	0	0	0	0	0	0	0	0	0	0	0	0	0
	k__Bacteria;p__NKB19;c__TSBW08;o__;f__;g__	0	0	0	0	0	0	0	0	0	0	0	0	0	0	0	0	0	0	0
	k__Bacteria;p__Nitrospirae;c__Nitrospira;o__Nitrospirales;f__;g__	0	0	0.001	0	0	0	0	0	0	0	0	0	0	0	0	0	0	0	0
	k__Bacteria;p__Nitrospirae;c__Nitrospira;o__Nitrospirales;f__FW;g__	0	0	0	0	0	0	0	0	0	0	0	0	0	0	0	0	0	0	0
	k__Bacteria;p__Nitrospirae;c__Nitrospira;o__Nitrospirales;f__FW;g__4-29	0	0	0	0	0	0	0	0	0	0	0	0	0	0	0	0	0	0	0
	k__Bacteria;p__Nitrospirae;c__Nitrospira;o__Nitrospirales;f__Nitrospiraceae;g__	0	0	0	0	0	0	0	0	0	0	0	0	0	0	0	0	0	0	0
	k__Bacteria;p__Nitrospirae;c__Nitrospira;o__Nitrospirales;f__Nitrospiraceae;g__Nitrospira	0	0	0.002	0	0	0	0	0	0	0	0	0	0	0	0	0	0	0	0
	k__Bacteria;p__Nitrospirae;c__Nitrospira;o__Nitrospirales;f__Thermodesulfovibrionaceae;Other	0	0	0	0	0	0	0	0	0	0	0	0	0	0	0	0	0	0	0
	k__Bacteria;p__Nitrospirae;c__Nitrospira;o__Nitrospirales;f__Thermodesulfovibrionaceae;g__	0	0	0	0	0	0	0	0	0	0	0	0	0	0	0	0	0	0	0
	k__Bacteria;p__Nitrospirae;c__Nitrospira;o__Nitrospirales;f__Thermodesulfovibrionaceae;g__BD2-6	0	0	0	0	0	0	0	0	0	0	0	0	0	0	0	0	0	0	0
	k__Bacteria;p__Nitrospirae;c__Nitrospira;o__Nitrospirales;f__Thermodesulfovibrionaceae;g__GOUTA19	0	0	0	0	0	0	0	0	0	0	0	0	0	0	0	0	0	0	0
	k__Bacteria;p__Nitrospirae;c__Nitrospira;o__Nitrospirales;f__Thermodesulfovibrionaceae;g__LCP-6	0	0	0	0	0	0	0	0	0	0	0	0	0	0	0	0	0	0	0
	k__Bacteria;p__OC31;c__;o__;f__;g__	0	0	0	0	0	0	0	0	0	0	0	0	0	0	0	0	0	0	0
	k__Bacteria;p__OD1;Other;Other;Other;Other	0	0	0.003	0.001	0	0	0	0	0	0	0	0	0	0	0	0	0	0	0
	k__Bacteria;p__OD1;c__;o__;f__;g__	0	0	0.004	0.001	0	0	0	0	0	0	0	0	0	0	0	0	0	0	0
	k__Bacteria;p__OD1;c__ABY1;o__;f__;g__	0	0	0.007	0.002	0	0	0	0	0	0	0	0	0	0	0	0	0	0	0
	k__Bacteria;p__OD1;c__Mb-NB09;o__;f__;g__	0	0	0.001	0	0	0	0	0	0	0	0	0	0	0	0	0	0	0	0
	k__Bacteria;p__OD1;c__SM2F11;o__;f__;g__	0	0	0.004	0.001	0	0	0	0	0	0	0	0	0	0	0	0	0	0	0
	k__Bacteria;p__OD1;c__ZB2;o__;f__;g__	0	0.001	0.01	0.004	0	0	0	0	0	0	0	0	0	0	0	0	0	0	0
	k__Bacteria;p__OP11;Other;Other;Other;Other	0	0	0	0	0	0	0	0	0	0	0	0	0	0	0	0	0	0	0
	k__Bacteria;p__OP11;c__OP11-2;Other;Other;Other	0	0	0	0	0	0	0	0	0	0	0	0	0	0	0	0	0	0	0
	k__Bacteria;p__OP11;c__OP11-2;o__;f__;g__	0	0	0	0	0	0	0	0	0	0	0	0	0	0	0	0	0	0	0
	k__Bacteria;p__OP11;c__OP11-2;o__KD3-145;f__;g__	0	0	0	0	0	0	0	0	0	0	0	0	0	0	0	0	0	0	0
	k__Bacteria;p__OP11;c__OP11-3;o__;f__;g__	0	0	0.001	0	0	0	0	0	0	0	0	0	0	0	0	0	0	0	0
	k__Bacteria;p__OP11;c__OP11-4;o__;f__;g__	0	0	0	0	0	0	0	0	0	0	0	0	0	0	0	0	0	0	0
	k__Bacteria;p__OP11;c__WCHB1-64;o__d153;f__;g__	0	0	0	0	0	0	0	0	0	0	0	0	0	0	0	0	0	0	0
	k__Bacteria;p__OP3;Other;Other;Other;Other	0	0	0.001	0	0	0	0	0	0	0	0	0	0	0	0	0	0	0	0
	k__Bacteria;p__OP3;c__;o__;f__;g__	0	0	0	0	0	0	0	0	0	0	0	0	0	0	0	0	0	0	0
	k__Bacteria;p__OP3;c__BD4-9;o__;f__;g__	0	0	0.002	0.001	0	0	0	0	0	0	0	0	0	0	0	0	0	0	0
	k__Bacteria;p__OP3;c__PBS-25;o__;f__;g__	0	0	0.002	0.001	0	0	0	0	0	0	0	0	0	0	0	0	0	0	0
	k__Bacteria;p__OP3;c__koll11;Other;Other;Other	0	0	0	0	0	0	0	0	0	0	0	0	0	0	0	0	0	0	0
	k__Bacteria;p__OP3;c__koll11;o__;f__;g__	0	0	0.003	0.002	0	0	0	0	0	0	0	0	0	0	0	0	0	0	0
	k__Bacteria;p__OP3;c__koll11;o__GIF10;f__;g__	0	0	0.005	0.001	0	0	0	0	0	0	0	0	0	0	0	0	0	0	0
	k__Bacteria;p__OP3;c__koll11;o__GIF10;f__kpj58rc;g__	0	0	0.002	0.001	0	0	0	0	0	0	0	0	0	0	0	0	0	0	0
	k__Bacteria;p__OP8;c__OP8_1;Other;Other;Other	0	0	0	0	0	0	0	0	0	0	0	0	0	0	0	0	0	0	0
	k__Bacteria;p__PAUC34f;c__;o__;f__;g__	0	0	0	0	0	0	0	0	0	0	0	0	0	0	0	0	0	0	0
	k__Bacteria;p__Planctomycetes;Other;Other;Other;Other	0	0	0	0	0	0	0	0	0	0	0	0	0	0	0	0	0	0	0
	k__Bacteria;p__Planctomycetes;c__;o__;f__;g__	0	0	0	0	0	0	0	0	0	0	0	0	0	0	0	0	0	0	0
	k__Bacteria;p__Planctomycetes;c__BD7-11;o__;f__;g__	0	0	0	0	0	0	0	0	0	0	0	0	0	0	0	0	0	0	0
	k__Bacteria;p__Planctomycetes;c__C6;o__MVS-107;f__;g__	0	0	0	0	0	0	0	0	0	0	0	0	0	0	0	0	0	0	0
	k__Bacteria;p__Planctomycetes;c__C6;o__d113;f__;g__	0	0	0	0	0	0	0	0	0	0	0	0	0	0	0	0	0	0	0
	k__Bacteria;p__Planctomycetes;c__OM190;o__CL500-15;f__;g__	0	0	0.001	0	0	0	0	0	0	0	0	0	0	0	0	0	0	0	0
	k__Bacteria;p__Planctomycetes;c__OM190;o__agg27;f__;g__	0	0	0	0	0	0	0	0	0	0	0	0	0	0	0	0	0	0	0
	k__Bacteria;p__Planctomycetes;c__Phycisphaerae;Other;Other;Other	0	0	0	0	0	0	0	0	0	0	0	0	0	0	0	0	0	0	0
	k__Bacteria;p__Planctomycetes;c__Phycisphaerae;o__;f__;g__	0	0	0.002	0.001	0	0	0	0	0	0	0	0	0	0	0	0	0	0	0
	k__Bacteria;p__Planctomycetes;c__Phycisphaerae;o__Phycisphaerales;Other;Other	0	0	0	0	0	0	0	0	0	0	0	0	0	0	0	0	0	0	0
	k__Bacteria;p__Planctomycetes;c__Phycisphaerae;o__Phycisphaerales;f__;g__	0	0	0	0	0	0	0	0	0	0	0	0	0	0	0	0	0	0	0
	k__Bacteria;p__Planctomycetes;c__Pla3;o__;f__;g__	0	0	0	0	0	0	0	0	0	0	0	0	0	0	0	0	0	0	0
	k__Bacteria;p__Planctomycetes;c__Pla4;o__;f__;g__	0	0	0	0	0	0	0	0	0	0	0	0	0	0	0	0	0	0	0
	k__Bacteria;p__Planctomycetes;c__Planctomycetia;o__Gemmatales;f__Gemmataceae;Other	0	0	0	0	0	0	0	0	0	0	0	0	0	0	0	0	0	0	0
	k__Bacteria;p__Planctomycetes;c__Planctomycetia;o__Gemmatales;f__Gemmataceae;g__	0	0	0	0	0	0	0	0	0	0	0	0	0	0	0	0	0	0	0
	k__Bacteria;p__Planctomycetes;c__Planctomycetia;o__Gemmatales;f__Gemmataceae;g__Gemmata	0	0	0	0	0	0	0	0	0	0	0	0	0	0	0	0	0	0	0
	k__Bacteria;p__Planctomycetes;c__Planctomycetia;o__Gemmatales;f__Isosphaeraceae;Other	0	0	0	0	0	0	0	0	0	0	0	0	0	0	0	0	0	0	0
	k__Bacteria;p__Planctomycetes;c__Planctomycetia;o__Gemmatales;f__Isosphaeraceae;g__	0	0	0	0	0	0	0	0	0	0	0	0	0	0	0	0	0	0	0
	k__Bacteria;p__Planctomycetes;c__Planctomycetia;o__Pirellulales;f__Pirellulaceae;Other	0	0	0	0	0	0	0	0	0	0	0	0	0	0	0	0	0	0	0
	k__Bacteria;p__Planctomycetes;c__Planctomycetia;o__Pirellulales;f__Pirellulaceae;g__	0	0	0.001	0	0	0	0	0	0	0	0	0	0	0	0	0	0	0	0
	k__Bacteria;p__Planctomycetes;c__Planctomycetia;o__Pirellulales;f__Pirellulaceae;g__A17	0	0	0	0	0	0	0	0	0	0	0	0	0	0	0	0	0	0	0
	k__Bacteria;p__Planctomycetes;c__Planctomycetia;o__Pirellulales;f__Pirellulaceae;g__Pirellula	0	0	0	0	0	0	0	0	0	0	0	0	0	0	0	0	0	0	0
	k__Bacteria;p__Planctomycetes;c__Planctomycetia;o__Planctomycetales;f__Planctomycetaceae;g__Planctomyces	0	0	0.001	0	0	0	0	0	0	0	0	0	0	0	0	0	0	0	0
	k__Bacteria;p__Planctomycetes;c__[Brocadiae];o__;f__;g__	0	0	0	0	0	0	0	0	0	0	0	0	0	0	0	0	0	0	0
	k__Bacteria;p__Planctomycetes;c__[Brocadiae];o__Brocadiales;f__Brocadiaceae;g__	0	0	0	0	0	0	0	0	0	0	0	0	0	0	0	0	0	0	0
	k__Bacteria;p__Planctomycetes;c__vadinHA49;o__DH61;f__;g__	0	0	0.002	0.001	0	0	0	0	0	0	0	0	0	0	0	0	0	0	0
	k__Bacteria;p__Planctomycetes;c__vadinHA49;o__PHOS-HE93;f__;g__	0	0	0	0	0	0	0	0	0	0	0	0	0	0	0	0	0	0	0
	k__Bacteria;p__Planctomycetes;c__vadinHA49;o__p04_C01;f__;g__	0	0	0	0	0	0	0	0	0	0	0	0	0	0	0	0	0	0	0
	k__Bacteria;p__Proteobacteria;Other;Other;Other;Other	0	0.003	0.039	0.021	0	0	0	0	0	0	0	0	0	0	0	0	0	0	0
	k__Bacteria;p__Proteobacteria;c__Alphaproteobacteria;Other;Other;Other	0	0.001	0.007	0.003	0	0	0	0	0	0	0	0	0.002	0	0	0	0	0	0
	k__Bacteria;p__Proteobacteria;c__Alphaproteobacteria;o__;f__;g__	0	0	0.001	0	0	0	0	0	0	0	0	0	0	0	0	0	0	0	0
	k__Bacteria;p__Proteobacteria;c__Alphaproteobacteria;o__BD7-3;f__;g__	0	0	0.001	0.001	0	0	0	0	0	0	0	0	0	0	0	0	0	0	0
	k__Bacteria;p__Proteobacteria;c__Alphaproteobacteria;o__Caulobacterales;Other;Other	0	0	0	0	0	0	0	0	0	0	0	0	0	0	0	0	0	0	0
	k__Bacteria;p__Proteobacteria;c__Alphaproteobacteria;o__Caulobacterales;f__;g__	0	0	0	0	0	0	0	0	0	0	0	0	0	0	0	0	0	0	0
	k__Bacteria;p__Proteobacteria;c__Alphaproteobacteria;o__Caulobacterales;f__Caulobacteraceae;Other	0	0	0	0	0	0	0	0	0	0	0	0	0	0	0	0	0	0	0
	k__Bacteria;p__Proteobacteria;c__Alphaproteobacteria;o__Caulobacterales;f__Caulobacteraceae;g__	0	0	0	0.001	0	0	0	0	0	0	0	0	0	0	0	0	0	0	0
	k__Bacteria;p__Proteobacteria;c__Alphaproteobacteria;o__Caulobacterales;f__Caulobacteraceae;g__Arthrospira	0	0	0	0	0	0	0	0	0	0	0	0	0	0	0	0	0	0	0
	k__Bacteria;p__Proteobacteria;c__Alphaproteobacteria;o__Caulobacterales;f__Caulobacteraceae;g__Asticcacaulis	0	0	0	0	0	0	0	0	0	0	0	0	0	0	0	0	0	0	0
	k__Bacteria;p__Proteobacteria;c__Alphaproteobacteria;o__Caulobacterales;f__Caulobacteraceae;g__Caulobacter	0	0	0.001	0	0	0	0	0	0	0	0	0	0	0	0	0	0	0	0
	k__Bacteria;p__Proteobacteria;c__Alphaproteobacteria;o__Caulobacterales;f__Caulobacteraceae;g__Mycoplana	0	0	0	0	0	0	0	0	0	0	0	0	0	0	0	0	0	0	0
	k__Bacteria;p__Proteobacteria;c__Alphaproteobacteria;o__Caulobacterales;f__Caulobacteraceae;g__Phenylobacterium	0	0	0	0	0	0	0	0	0	0	0	0	0	0	0	0	0	0	0
	k__Bacteria;p__Proteobacteria;c__Alphaproteobacteria;o__Ellin329;f__;g__	0	0	0.001	0	0	0	0	0	0	0	0	0	0	0	0	0	0	0	0
	k__Bacteria;p__Proteobacteria;c__Alphaproteobacteria;o__RF32;f__;g__	0	0	0	0	0	0	0	0	0	0	0	0	0	0	0	0	0	0	0
	k__Bacteria;p__Proteobacteria;c__Alphaproteobacteria;o__Rhizobiales;Other;Other	0	0	0.003	0.003	0	0	0	0	0	0	0	0	0	0	0	0	0	0	0
	k__Bacteria;p__Proteobacteria;c__Alphaproteobacteria;o__Rhizobiales;f__;g__	0	0	0	0	0	0	0	0	0	0	0	0	0	0	0	0	0	0	0
	k__Bacteria;p__Proteobacteria;c__Alphaproteobacteria;o__Rhizobiales;f__Aurantimonadaceae;g__	0	0	0	0	0	0	0	0	0	0	0	0	0	0	0	0	0	0	0
	k__Bacteria;p__Proteobacteria;c__Alphaproteobacteria;o__Rhizobiales;f__Bartonellaceae;g__	0	0	0	0	0	0	0	0	0	0	0	0	0	0	0	0	0	0	0
	k__Bacteria;p__Proteobacteria;c__Alphaproteobacteria;o__Rhizobiales;f__Bradyrhizobiaceae;Other	0	0	0	0	0	0	0	0	0	0	0	0	0	0	0	0	0	0	0
	k__Bacteria;p__Proteobacteria;c__Alphaproteobacteria;o__Rhizobiales;f__Bradyrhizobiaceae;g__Bosea	0	0	0	0	0	0	0	0	0	0	0	0	0	0	0	0	0	0	0
	k__Bacteria;p__Proteobacteria;c__Alphaproteobacteria;o__Rhizobiales;f__Bradyrhizobiaceae;g__Bradyrhizobium	0	0	0.001	0.001	0	0	0	0	0	0	0	0	0	0	0	0	0	0	0
	k__Bacteria;p__Proteobacteria;c__Alphaproteobacteria;o__Rhizobiales;f__Brucellaceae;Other	0	0	0	0	0	0	0	0	0	0	0	0	0	0	0	0	0	0	0
	k__Bacteria;p__Proteobacteria;c__Alphaproteobacteria;o__Rhizobiales;f__Brucellaceae;g__Ochrobactrum	0	0	0	0	0	0	0	0	0	0	0	0	0	0	0.001	0	0	0	0
	k__Bacteria;p__Proteobacteria;c__Alphaproteobacteria;o__Rhizobiales;f__Hyphomicrobiaceae;Other	0	0	0.001	0.001	0	0	0	0	0	0	0	0	0	0	0	0	0	0	0
	k__Bacteria;p__Proteobacteria;c__Alphaproteobacteria;o__Rhizobiales;f__Hyphomicrobiaceae;g__	0	0	0.001	0.001	0	0	0	0	0	0	0	0	0	0	0	0	0	0	0
	k__Bacteria;p__Proteobacteria;c__Alphaproteobacteria;o__Rhizobiales;f__Hyphomicrobiaceae;g__Devosia	0	0	0	0.001	0	0	0	0	0	0	0	0	0	0	0	0	0	0	0
	k__Bacteria;p__Proteobacteria;c__Alphaproteobacteria;o__Rhizobiales;f__Hyphomicrobiaceae;g__Hyphomicrobium	0	0	0.001	0.001	0	0	0	0	0	0	0	0	0	0	0	0	0	0	0
	k__Bacteria;p__Proteobacteria;c__Alphaproteobacteria;o__Rhizobiales;f__Hyphomicrobiaceae;g__Pedomicrobium	0	0	0	0	0	0	0	0	0	0	0	0	0	0	0	0	0	0	0
	k__Bacteria;p__Proteobacteria;c__Alphaproteobacteria;o__Rhizobiales;f__Hyphomicrobiaceae;g__Rhodoplanes	0	0	0.003	0.001	0	0	0	0	0	0	0	0	0	0	0	0	0	0	0
	k__Bacteria;p__Proteobacteria;c__Alphaproteobacteria;o__Rhizobiales;f__Methylobacteriaceae;Other	0	0	0	0	0	0	0	0	0	0	0	0	0	0	0	0	0	0	0
	k__Bacteria;p__Proteobacteria;c__Alphaproteobacteria;o__Rhizobiales;f__Methylobacteriaceae;g__	0	0	0	0	0	0	0	0	0	0	0	0	0	0	0	0	0	0	0
	k__Bacteria;p__Proteobacteria;c__Alphaproteobacteria;o__Rhizobiales;f__Methylobacteriaceae;g__Methylobacterium	0	0	0	0	0	0	0	0	0	0	0	0	0	0	0	0.001	0	0	0
	k__Bacteria;p__Proteobacteria;c__Alphaproteobacteria;o__Rhizobiales;f__Methylocystaceae;Other	0	0	0	0	0	0	0	0	0	0	0	0	0	0	0	0	0	0	0
	k__Bacteria;p__Proteobacteria;c__Alphaproteobacteria;o__Rhizobiales;f__Methylocystaceae;g__	0	0	0	0	0	0	0	0	0	0	0	0	0	0	0	0	0	0	0
	k__Bacteria;p__Proteobacteria;c__Alphaproteobacteria;o__Rhizobiales;f__Methylocystaceae;g__Methylopila	0	0	0	0	0	0	0	0	0	0	0	0	0	0	0	0	0	0	0
	k__Bacteria;p__Proteobacteria;c__Alphaproteobacteria;o__Rhizobiales;f__Methylocystaceae;g__Methylosinus	0	0	0.002	0.001	0	0	0	0	0	0	0	0	0	0	0	0	0	0	0
	k__Bacteria;p__Proteobacteria;c__Alphaproteobacteria;o__Rhizobiales;f__Methylocystaceae;g__Pleomorphomonas	0	0	0	0	0	0	0	0	0	0	0	0	0	0	0	0	0	0	0
	k__Bacteria;p__Proteobacteria;c__Alphaproteobacteria;o__Rhizobiales;f__Phyllobacteriaceae;Other	0	0	0	0	0	0	0	0	0	0	0	0	0	0	0	0	0	0	0
	k__Bacteria;p__Proteobacteria;c__Alphaproteobacteria;o__Rhizobiales;f__Phyllobacteriaceae;g__	0	0	0	0	0	0	0	0	0	0	0	0	0	0	0	0	0	0	0
	k__Bacteria;p__Proteobacteria;c__Alphaproteobacteria;o__Rhizobiales;f__Phyllobacteriaceae;g__Aminobacter	0	0	0	0	0	0	0	0	0	0	0	0	0	0	0	0	0	0	0
	k__Bacteria;p__Proteobacteria;c__Alphaproteobacteria;o__Rhizobiales;f__Rhizobiaceae;Other	0	0	0	0	0	0	0	0	0	0	0	0	0	0	0	0	0	0	0
	k__Bacteria;p__Proteobacteria;c__Alphaproteobacteria;o__Rhizobiales;f__Rhizobiaceae;g__Agrobacterium	0	0	0.001	0.001	0	0	0	0.001	0	0	0	0	0.001	0	0.001	0	0	0	0
	k__Bacteria;p__Proteobacteria;c__Alphaproteobacteria;o__Rhizobiales;f__Rhizobiaceae;g__Kaistia	0	0	0	0	0	0	0	0	0	0	0	0	0	0	0	0	0	0	0
	k__Bacteria;p__Proteobacteria;c__Alphaproteobacteria;o__Rhizobiales;f__Rhizobiaceae;g__Rhizobium	0	0	0	0	0	0	0	0	0	0	0	0	0	0	0	0	0	0	0
	k__Bacteria;p__Proteobacteria;c__Alphaproteobacteria;o__Rhizobiales;f__Rhodobiaceae;g__	0	0	0	0	0	0	0	0	0	0	0	0	0	0	0	0	0	0	0
	k__Bacteria;p__Proteobacteria;c__Alphaproteobacteria;o__Rhizobiales;f__Xanthobacteraceae;Other	0	0	0	0	0	0	0	0	0	0	0	0	0	0	0	0	0	0	0
	k__Bacteria;p__Proteobacteria;c__Alphaproteobacteria;o__Rhizobiales;f__Xanthobacteraceae;g__	0	0	0	0	0	0	0	0	0	0	0	0	0	0	0	0	0	0	0
	k__Bacteria;p__Proteobacteria;c__Alphaproteobacteria;o__Rhizobiales;f__Xanthobacteraceae;g__Blastochloris	0	0	0	0	0	0	0	0	0	0	0	0	0	0	0	0	0	0	0
	k__Bacteria;p__Proteobacteria;c__Alphaproteobacteria;o__Rhizobiales;f__Xanthobacteraceae;g__Labrys	0	0	0	0	0	0	0	0	0	0	0	0	0	0	0	0	0	0	0
	k__Bacteria;p__Proteobacteria;c__Alphaproteobacteria;o__Rhizobiales;f__Xanthobacteraceae;g__Xanthobacter	0	0	0	0	0	0	0	0	0	0	0	0	0	0	0	0	0	0	0
	k__Bacteria;p__Proteobacteria;c__Alphaproteobacteria;o__Rhodobacterales;Other;Other	0	0	0	0	0	0	0	0	0	0	0	0	0	0	0	0	0	0	0
	k__Bacteria;p__Proteobacteria;c__Alphaproteobacteria;o__Rhodobacterales;f__Hyphomonadaceae;g__	0	0	0.001	0.001	0	0	0	0	0	0	0	0	0	0	0	0	0	0	0
	k__Bacteria;p__Proteobacteria;c__Alphaproteobacteria;o__Rhodobacterales;f__Rhodobacteraceae;Other	0	0	0	0	0	0	0	0	0	0	0	0	0	0	0	0	0	0	0
	k__Bacteria;p__Proteobacteria;c__Alphaproteobacteria;o__Rhodobacterales;f__Rhodobacteraceae;g__Paracoccus	0	0	0	0	0	0	0	0	0	0	0	0	0	0	0	0	0	0	0
	k__Bacteria;p__Proteobacteria;c__Alphaproteobacteria;o__Rhodobacterales;f__Rhodobacteraceae;g__Rhodobacter	0	0	0.001	0.002	0	0	0	0	0	0	0	0	0	0	0	0	0	0	0
	k__Bacteria;p__Proteobacteria;c__Alphaproteobacteria;o__Rhodobacterales;f__Rhodobacteraceae;g__Rubellimicrobium	0	0	0	0	0	0	0	0	0	0	0	0	0	0	0	0	0	0	0
	k__Bacteria;p__Proteobacteria;c__Alphaproteobacteria;o__Rhodospirillales;Other;Other	0	0	0.001	0	0	0	0	0	0	0	0	0	0	0	0	0	0	0	0
	k__Bacteria;p__Proteobacteria;c__Alphaproteobacteria;o__Rhodospirillales;f__;g__	0	0	0.001	0	0	0	0	0	0	0	0	0	0	0	0	0	0	0	0
	k__Bacteria;p__Proteobacteria;c__Alphaproteobacteria;o__Rhodospirillales;f__Acetobacteraceae;Other	0	0	0	0	0	0	0	0	0.001	0	0	0	0	0	0	0	0	0.001	0
	k__Bacteria;p__Proteobacteria;c__Alphaproteobacteria;o__Rhodospirillales;f__Acetobacteraceae;g__	0	0	0	0	0	0	0	0	0	0	0	0	0	0	0	0	0	0	0
	k__Bacteria;p__Proteobacteria;c__Alphaproteobacteria;o__Rhodospirillales;f__Acetobacteraceae;g__Acetobacter	0	0.018	0	0.001	0.001	0.041	0.001	0.078	0.006	0.004	0.001	0.012	0.021	0.008	0.027	0.004	0.001	0.113	0.001
	k__Bacteria;p__Proteobacteria;c__Alphaproteobacteria;o__Rhodospirillales;f__Acetobacteraceae;g__Gluconobacter	0	0	0	0	0	0	0	0	0	0	0	0	0	0	0	0	0	0	0
	k__Bacteria;p__Proteobacteria;c__Alphaproteobacteria;o__Rhodospirillales;f__Acetobacteraceae;g__Roseomonas	0	0	0	0	0	0	0	0	0	0	0	0	0	0	0	0	0	0	0
	k__Bacteria;p__Proteobacteria;c__Alphaproteobacteria;o__Rhodospirillales;f__Rhodospirillaceae;Other	0	0	0	0	0	0	0	0	0	0	0	0	0	0	0	0	0	0	0
	k__Bacteria;p__Proteobacteria;c__Alphaproteobacteria;o__Rhodospirillales;f__Rhodospirillaceae;g__	0	0	0.003	0.001	0	0	0	0	0	0	0	0	0	0	0	0	0	0	0
	k__Bacteria;p__Proteobacteria;c__Alphaproteobacteria;o__Rhodospirillales;f__Rhodospirillaceae;g__Azospirillum	0	0	0	0	0	0	0	0	0	0	0	0	0	0	0	0	0	0	0
	k__Bacteria;p__Proteobacteria;c__Alphaproteobacteria;o__Rhodospirillales;f__Rhodospirillaceae;g__Magnetospirillum	0	0	0	0.001	0	0	0	0	0	0	0	0	0	0	0	0	0	0	0
	k__Bacteria;p__Proteobacteria;c__Alphaproteobacteria;o__Rhodospirillales;f__Rhodospirillaceae;g__Novispirillum	0	0	0	0.001	0	0	0	0	0	0	0	0	0	0	0	0	0	0	0
	k__Bacteria;p__Proteobacteria;c__Alphaproteobacteria;o__Rhodospirillales;f__Rhodospirillaceae;g__Phaeospirillum	0	0	0	0	0	0	0	0	0	0	0	0	0	0	0	0	0	0	0
	k__Bacteria;p__Proteobacteria;c__Alphaproteobacteria;o__Rhodospirillales;f__Rhodospirillaceae;g__Rhodospirillum	0	0	0	0	0	0	0	0	0	0	0	0	0	0	0	0	0	0	0
	k__Bacteria;p__Proteobacteria;c__Alphaproteobacteria;o__Rhodospirillales;f__Rhodospirillaceae;g__Telmatospirillum	0	0	0	0	0	0	0	0	0	0	0	0	0	0	0	0	0	0	0
	k__Bacteria;p__Proteobacteria;c__Alphaproteobacteria;o__Rickettsiales;Other;Other	0	0	0	0	0	0	0	0	0	0	0	0	0	0	0	0	0	0	0
	k__Bacteria;p__Proteobacteria;c__Alphaproteobacteria;o__Rickettsiales;f__;g__	0	0	0.002	0.001	0	0	0	0	0	0	0	0	0	0	0	0	0	0	0
	k__Bacteria;p__Proteobacteria;c__Alphaproteobacteria;o__Rickettsiales;f__Holosporaceae;g__	0	0	0	0	0	0	0	0	0	0	0	0	0	0	0	0	0	0	0
	k__Bacteria;p__Proteobacteria;c__Alphaproteobacteria;o__Rickettsiales;f__Rickettsiaceae;Other	0	0	0	0	0	0	0	0	0	0	0	0	0	0	0	0	0	0	0
	k__Bacteria;p__Proteobacteria;c__Alphaproteobacteria;o__Rickettsiales;f__Rickettsiaceae;g__	0	0	0	0	0	0	0	0	0	0	0	0	0	0	0	0	0	0	0
	k__Bacteria;p__Proteobacteria;c__Alphaproteobacteria;o__Rickettsiales;f__Rickettsiaceae;g__Rickettsia	0	0	0	0	0	0	0	0	0	0	0	0	0	0	0	0	0	0	0
	k__Bacteria;p__Proteobacteria;c__Alphaproteobacteria;o__Rickettsiales;f__mitochondria;g__	0	0	0	0.001	0.001	0	0	0	0	0	0	0	0	0	0	0	0	0	0
	k__Bacteria;p__Proteobacteria;c__Alphaproteobacteria;o__Sphingomonadales;Other;Other	0	0	0.001	0.001	0	0	0	0	0	0	0	0	0	0	0	0	0	0	0
	k__Bacteria;p__Proteobacteria;c__Alphaproteobacteria;o__Sphingomonadales;f__Erythrobacteraceae;Other	0	0	0	0	0	0	0	0	0	0	0	0	0	0	0	0	0	0	0
	k__Bacteria;p__Proteobacteria;c__Alphaproteobacteria;o__Sphingomonadales;f__Erythrobacteraceae;g__	0	0	0	0	0	0	0	0	0	0	0	0	0	0	0	0	0	0	0
	k__Bacteria;p__Proteobacteria;c__Alphaproteobacteria;o__Sphingomonadales;f__Sphingomonadaceae;Other	0	0	0.002	0.001	0	0	0	0	0	0	0	0	0	0	0	0	0	0	0
	k__Bacteria;p__Proteobacteria;c__Alphaproteobacteria;o__Sphingomonadales;f__Sphingomonadaceae;g__	0	0	0.001	0	0	0	0	0	0	0	0	0	0	0	0	0	0	0	0
	k__Bacteria;p__Proteobacteria;c__Alphaproteobacteria;o__Sphingomonadales;f__Sphingomonadaceae;g__Blastomonas	0	0	0	0	0	0	0	0	0	0	0	0	0	0	0	0	0	0	0
	k__Bacteria;p__Proteobacteria;c__Alphaproteobacteria;o__Sphingomonadales;f__Sphingomonadaceae;g__Kaistobacter	0	0	0	0	0	0	0	0	0	0	0	0	0	0	0	0	0	0	0
	k__Bacteria;p__Proteobacteria;c__Alphaproteobacteria;o__Sphingomonadales;f__Sphingomonadaceae;g__Novosphingobium	0	0.001	0.007	0.007	0	0	0	0	0	0	0	0	0	0	0	0	0	0	0
	k__Bacteria;p__Proteobacteria;c__Alphaproteobacteria;o__Sphingomonadales;f__Sphingomonadaceae;g__Sphingobium	0	0	0.001	0.001	0	0	0	0	0	0	0	0	0	0	0	0	0	0	0
	k__Bacteria;p__Proteobacteria;c__Alphaproteobacteria;o__Sphingomonadales;f__Sphingomonadaceae;g__Sphingomonas	0	0	0.001	0.001	0	0	0.001	0	0.001	0	0	0	0	0	0	0.001	0	0	0
	k__Bacteria;p__Proteobacteria;c__Alphaproteobacteria;o__Sphingomonadales;f__Sphingomonadaceae;g__Zymomonas	0	0	0	0	0	0	0	0	0	0	0	0	0	0	0	0	0	0	0
	k__Bacteria;p__Proteobacteria;c__Betaproteobacteria;Other;Other;Other	0	0.008	0.1	0.043	0	0	0	0	0	0	0	0	0	0	0	0	0	0	0
	k__Bacteria;p__Proteobacteria;c__Betaproteobacteria;o__;f__;g__	0	0	0.002	0.001	0	0	0	0	0	0	0	0	0	0	0	0	0	0	0
	k__Bacteria;p__Proteobacteria;c__Betaproteobacteria;o__A21b;f__EB1003;g__	0	0	0	0	0	0	0	0	0	0	0	0	0	0	0	0	0	0	0
	k__Bacteria;p__Proteobacteria;c__Betaproteobacteria;o__ASSO-13;f__;g__	0	0	0	0	0	0	0	0	0	0	0	0	0	0	0	0	0	0	0
	k__Bacteria;p__Proteobacteria;c__Betaproteobacteria;o__Burkholderiales;Other;Other	0	0.001	0.006	0.004	0	0	0	0	0	0	0	0	0	0	0	0	0	0	0
	k__Bacteria;p__Proteobacteria;c__Betaproteobacteria;o__Burkholderiales;f__Alcaligenaceae;Other	0	0	0	0	0	0	0	0	0	0	0	0	0.001	0	0	0	0.001	0	0
	k__Bacteria;p__Proteobacteria;c__Betaproteobacteria;o__Burkholderiales;f__Alcaligenaceae;g__	0	0	0.001	0	0	0	0	0	0	0	0	0	0	0	0	0	0	0	0
	k__Bacteria;p__Proteobacteria;c__Betaproteobacteria;o__Burkholderiales;f__Alcaligenaceae;g__Achromobacter	0	0	0	0	0	0	0	0	0	0	0	0	0	0	0	0	0	0	0
	k__Bacteria;p__Proteobacteria;c__Betaproteobacteria;o__Burkholderiales;f__Burkholderiaceae;g__	0	0	0	0	0	0	0	0	0	0	0	0	0	0	0	0	0	0	0
	k__Bacteria;p__Proteobacteria;c__Betaproteobacteria;o__Burkholderiales;f__Burkholderiaceae;g__Burkholderia	0	0	0	0	0	0	0	0	0	0	0	0	0	0	0	0	0	0	0
	k__Bacteria;p__Proteobacteria;c__Betaproteobacteria;o__Burkholderiales;f__Burkholderiaceae;g__Lautropia	0	0	0	0	0.002	0	0	0	0	0	0	0	0	0	0	0	0	0	0
	k__Bacteria;p__Proteobacteria;c__Betaproteobacteria;o__Burkholderiales;f__Comamonadaceae;Other	0	0.021	0.185	0.183	0	0	0.004	0.003	0.001	0.001	0	0	0.002	0.001	0.007	0.001	0	0.002	0
	k__Bacteria;p__Proteobacteria;c__Betaproteobacteria;o__Burkholderiales;f__Comamonadaceae;g__	0	0	0.002	0.001	0	0	0	0	0	0	0	0	0	0	0	0	0	0	0
	k__Bacteria;p__Proteobacteria;c__Betaproteobacteria;o__Burkholderiales;f__Comamonadaceae;g__Acidovorax	0	0	0	0	0	0	0	0	0	0	0	0	0	0	0	0	0	0	0
	k__Bacteria;p__Proteobacteria;c__Betaproteobacteria;o__Burkholderiales;f__Comamonadaceae;g__Aquabacterium	0	0	0	0	0	0	0	0	0	0	0	0	0	0	0	0	0	0	0
	k__Bacteria;p__Proteobacteria;c__Betaproteobacteria;o__Burkholderiales;f__Comamonadaceae;g__Comamonas	0	0	0	0	0	0	0	0	0	0	0	0	0	0	0	0	0	0	0
	k__Bacteria;p__Proteobacteria;c__Betaproteobacteria;o__Burkholderiales;f__Comamonadaceae;g__Giesbergeria	0	0	0	0	0	0	0	0	0	0	0	0	0	0	0	0	0	0	0
	k__Bacteria;p__Proteobacteria;c__Betaproteobacteria;o__Burkholderiales;f__Comamonadaceae;g__Hydrogenophaga	0	0.001	0.023	0.003	0	0	0	0	0	0	0	0	0	0	0	0	0	0	0
	k__Bacteria;p__Proteobacteria;c__Betaproteobacteria;o__Burkholderiales;f__Comamonadaceae;g__Hylemonella	0	0	0	0	0	0	0	0	0	0	0	0	0	0	0	0	0	0	0
	k__Bacteria;p__Proteobacteria;c__Betaproteobacteria;o__Burkholderiales;f__Comamonadaceae;g__Leptothrix	0	0	0	0	0	0	0	0	0	0	0	0	0	0	0	0	0	0	0
	k__Bacteria;p__Proteobacteria;c__Betaproteobacteria;o__Burkholderiales;f__Comamonadaceae;g__Methylibium	0	0	0	0	0	0	0	0	0	0	0	0	0	0	0	0	0	0	0
	k__Bacteria;p__Proteobacteria;c__Betaproteobacteria;o__Burkholderiales;f__Comamonadaceae;g__Rubrivivax	0	0.001	0.006	0.008	0	0	0	0	0	0	0	0	0	0	0	0	0	0	0
	k__Bacteria;p__Proteobacteria;c__Betaproteobacteria;o__Burkholderiales;f__Comamonadaceae;g__Schlegelella	0	0	0	0	0	0	0	0	0	0	0	0	0	0	0	0	0	0	0
	k__Bacteria;p__Proteobacteria;c__Betaproteobacteria;o__Burkholderiales;f__Oxalobacteraceae;Other	0	0.001	0.004	0.003	0	0	0.001	0	0	0	0	0	0	0	0	0	0.002	0	0
	k__Bacteria;p__Proteobacteria;c__Betaproteobacteria;o__Burkholderiales;f__Oxalobacteraceae;g__	0	0	0.002	0.002	0	0	0	0	0	0	0	0	0	0	0	0	0	0	0
	k__Bacteria;p__Proteobacteria;c__Betaproteobacteria;o__Burkholderiales;f__Oxalobacteraceae;g__Herbaspirillum	0	0	0	0	0	0	0	0	0	0	0	0	0	0	0	0	0	0	0
	k__Bacteria;p__Proteobacteria;c__Betaproteobacteria;o__Burkholderiales;f__Oxalobacteraceae;g__Janthinobacterium	0	0	0.003	0.002	0	0	0.001	0	0	0	0	0	0	0	0	0	0	0	0
	k__Bacteria;p__Proteobacteria;c__Betaproteobacteria;o__Burkholderiales;f__Oxalobacteraceae;g__Polynucleobacter	0	0	0.006	0.002	0	0	0	0	0	0	0	0	0	0	0	0	0	0	0
	k__Bacteria;p__Proteobacteria;c__Betaproteobacteria;o__Burkholderiales;f__Oxalobacteraceae;g__Ralstonia	0	0	0	0	0	0	0	0	0	0	0	0	0	0	0	0	0	0	0
	k__Bacteria;p__Proteobacteria;c__Betaproteobacteria;o__Ellin6067;f__;g__	0	0	0.001	0	0	0	0	0	0	0	0	0	0	0	0	0	0	0	0
	k__Bacteria;p__Proteobacteria;c__Betaproteobacteria;o__Gallionellales;f__;g__	0	0	0	0	0	0	0	0	0	0	0	0	0	0	0	0	0	0	0
	k__Bacteria;p__Proteobacteria;c__Betaproteobacteria;o__Gallionellales;f__Gallionellaceae;Other	0	0	0	0	0	0	0	0	0	0	0	0	0	0	0	0	0	0	0
	k__Bacteria;p__Proteobacteria;c__Betaproteobacteria;o__IS-44;f__;g__	0	0	0	0	0	0	0	0	0	0	0	0	0	0	0	0	0	0	0
	k__Bacteria;p__Proteobacteria;c__Betaproteobacteria;o__MND1;f__;g__	0	0	0.003	0	0	0	0	0	0	0	0	0	0	0	0	0	0	0	0
	k__Bacteria;p__Proteobacteria;c__Betaproteobacteria;o__Methylophilales;Other;Other	0	0	0.002	0.001	0	0	0	0	0	0	0	0	0	0	0	0	0	0	0
	k__Bacteria;p__Proteobacteria;c__Betaproteobacteria;o__Methylophilales;f__;g__	0	0	0	0	0	0	0	0	0	0	0	0	0	0	0	0	0	0	0
	k__Bacteria;p__Proteobacteria;c__Betaproteobacteria;o__Methylophilales;f__Methylophilaceae;Other	0	0	0.001	0.001	0	0	0	0	0	0	0	0	0	0	0	0	0	0	0
	k__Bacteria;p__Proteobacteria;c__Betaproteobacteria;o__Methylophilales;f__Methylophilaceae;g__	0	0	0.001	0	0	0	0	0	0	0	0	0	0	0	0	0	0	0	0
	k__Bacteria;p__Proteobacteria;c__Betaproteobacteria;o__Methylophilales;f__Methylophilaceae;g__Methylotenera	0	0	0.002	0.003	0	0	0	0	0	0	0	0	0	0	0	0	0	0	0
	k__Bacteria;p__Proteobacteria;c__Betaproteobacteria;o__Neisseriales;f__Neisseriaceae;Other	0	0	0	0.001	0.002	0	0	0	0	0	0	0	0	0	0	0	0	0	0
	k__Bacteria;p__Proteobacteria;c__Betaproteobacteria;o__Neisseriales;f__Neisseriaceae;g__	0	0	0.001	0.001	0	0	0	0	0	0	0	0	0	0	0	0	0	0	0
	k__Bacteria;p__Proteobacteria;c__Betaproteobacteria;o__Neisseriales;f__Neisseriaceae;g__Aquitalea	0	0	0.001	0.003	0	0	0	0	0	0	0	0	0	0	0	0	0	0	0
	k__Bacteria;p__Proteobacteria;c__Betaproteobacteria;o__Neisseriales;f__Neisseriaceae;g__Chromobacterium	0	0	0	0	0	0	0	0	0	0	0	0	0	0	0	0	0	0	0
	k__Bacteria;p__Proteobacteria;c__Betaproteobacteria;o__Neisseriales;f__Neisseriaceae;g__Kingella	0	0	0	0	0	0	0	0	0	0	0	0	0	0	0	0	0	0	0
	k__Bacteria;p__Proteobacteria;c__Betaproteobacteria;o__Neisseriales;f__Neisseriaceae;g__Neisseria	0	0.001	0	0.001	0.01	0	0	0	0	0	0	0	0	0	0	0	0	0	0
	k__Bacteria;p__Proteobacteria;c__Betaproteobacteria;o__Neisseriales;f__Neisseriaceae;g__Vogesella	0	0.001	0.004	0.008	0	0	0	0	0	0	0	0	0	0	0	0	0	0	0
	k__Bacteria;p__Proteobacteria;c__Betaproteobacteria;o__Procabacteriales;Other;Other	0	0	0	0	0	0	0	0	0	0	0	0	0	0	0	0	0	0	0
	k__Bacteria;p__Proteobacteria;c__Betaproteobacteria;o__Procabacteriales;f__Procabacteriaceae;g__	0	0	0.001	0	0	0	0	0	0	0	0	0	0	0	0	0	0	0	0
	k__Bacteria;p__Proteobacteria;c__Betaproteobacteria;o__Rhodocyclales;f__Rhodocyclaceae;Other	0	0.001	0.013	0.012	0	0	0	0	0	0	0	0	0	0	0	0	0	0	0
	k__Bacteria;p__Proteobacteria;c__Betaproteobacteria;o__Rhodocyclales;f__Rhodocyclaceae;g__	0	0	0	0	0	0	0	0	0	0	0	0	0	0	0	0	0	0	0
	k__Bacteria;p__Proteobacteria;c__Betaproteobacteria;o__Rhodocyclales;f__Rhodocyclaceae;g__Azospira	0	0	0.001	0	0	0	0	0	0	0	0	0	0	0	0	0	0	0	0
	k__Bacteria;p__Proteobacteria;c__Betaproteobacteria;o__Rhodocyclales;f__Rhodocyclaceae;g__Azovibrio	0	0	0	0	0	0	0	0	0	0	0	0	0	0	0	0	0	0	0
	k__Bacteria;p__Proteobacteria;c__Betaproteobacteria;o__Rhodocyclales;f__Rhodocyclaceae;g__C39	0	0	0.007	0.001	0	0	0	0	0	0	0	0	0	0	0	0	0	0	0
	k__Bacteria;p__Proteobacteria;c__Betaproteobacteria;o__Rhodocyclales;f__Rhodocyclaceae;g__Candidatus Accumulibacter	0	0	0	0	0	0	0	0	0	0	0	0	0	0	0	0	0	0	0
	k__Bacteria;p__Proteobacteria;c__Betaproteobacteria;o__Rhodocyclales;f__Rhodocyclaceae;g__Dechloromonas	0	0.001	0.004	0.007	0	0	0	0	0	0	0	0	0	0	0	0	0	0	0
	k__Bacteria;p__Proteobacteria;c__Betaproteobacteria;o__Rhodocyclales;f__Rhodocyclaceae;g__Dok59	0	0	0	0	0	0	0	0	0	0	0	0	0	0	0	0	0	0	0
	k__Bacteria;p__Proteobacteria;c__Betaproteobacteria;o__Rhodocyclales;f__Rhodocyclaceae;g__KD1-23	0	0	0	0.001	0	0	0	0	0	0	0	0	0	0	0	0	0	0	0
	k__Bacteria;p__Proteobacteria;c__Betaproteobacteria;o__Rhodocyclales;f__Rhodocyclaceae;g__Propionivibrio	0	0	0	0	0	0	0	0	0	0	0	0	0	0	0	0	0	0	0
	k__Bacteria;p__Proteobacteria;c__Betaproteobacteria;o__Rhodocyclales;f__Rhodocyclaceae;g__Sterolibacterium	0	0	0	0	0	0	0	0	0	0	0	0	0	0	0	0	0	0	0
	k__Bacteria;p__Proteobacteria;c__Betaproteobacteria;o__Rhodocyclales;f__Rhodocyclaceae;g__Sulfuritalea	0	0	0	0	0	0	0	0	0	0	0	0	0	0	0	0	0	0	0
	k__Bacteria;p__Proteobacteria;c__Betaproteobacteria;o__Rhodocyclales;f__Rhodocyclaceae;g__Uliginosibacterium	0	0.001	0.006	0.01	0	0	0	0	0	0	0	0	0	0	0	0	0	0	0
	k__Bacteria;p__Proteobacteria;c__Betaproteobacteria;o__Rhodocyclales;f__Rhodocyclaceae;g__Zoogloea	0	0.002	0.004	0.025	0	0	0	0	0	0	0	0	0	0	0	0	0	0	0
	k__Bacteria;p__Proteobacteria;c__Betaproteobacteria;o__SBla14;f__;g__	0	0	0	0	0	0	0	0	0	0	0	0	0	0	0	0	0	0	0
	k__Bacteria;p__Proteobacteria;c__Betaproteobacteria;o__SC-I-84;f__;g__	0	0	0.001	0.001	0	0	0	0	0	0	0	0	0	0	0	0	0	0	0
	k__Bacteria;p__Proteobacteria;c__Betaproteobacteria;o__Tremblayales;f__Tremblayaceae;g__	0	0	0	0	0	0	0	0	0	0	0	0	0	0	0	0	0	0	0
	k__Bacteria;p__Proteobacteria;c__Betaproteobacteria;o__YCC11;f__;g__	0	0	0	0	0	0	0	0	0	0	0	0	0	0	0	0	0	0	0
	k__Bacteria;p__Proteobacteria;c__Deltaproteobacteria;Other;Other;Other	0	0	0.004	0.002	0	0	0	0	0	0	0	0	0	0	0	0	0	0	0
	k__Bacteria;p__Proteobacteria;c__Deltaproteobacteria;o__;f__;g__	0	0	0	0	0	0	0	0	0	0	0	0	0	0	0	0	0	0	0
	k__Bacteria;p__Proteobacteria;c__Deltaproteobacteria;o__BPC076;f__;g__	0	0	0	0	0	0	0	0	0	0	0	0	0	0	0	0	0	0	0
	k__Bacteria;p__Proteobacteria;c__Deltaproteobacteria;o__Bdellovibrionales;f__;g__	0	0	0	0	0	0	0	0	0	0	0	0	0	0	0	0	0	0	0
	k__Bacteria;p__Proteobacteria;c__Deltaproteobacteria;o__Bdellovibrionales;f__Bacteriovoracaceae;Other	0	0	0	0	0	0	0	0	0	0	0	0	0	0	0	0	0	0	0
	k__Bacteria;p__Proteobacteria;c__Deltaproteobacteria;o__Bdellovibrionales;f__Bacteriovoracaceae;g__	0	0	0.005	0.002	0	0	0	0	0	0	0	0	0	0	0	0	0	0	0
	k__Bacteria;p__Proteobacteria;c__Deltaproteobacteria;o__Bdellovibrionales;f__Bdellovibrionaceae;g__Bdellovibrio	0	0	0.006	0.002	0	0	0	0	0	0	0	0	0	0	0	0	0	0	0
	k__Bacteria;p__Proteobacteria;c__Deltaproteobacteria;o__DTB120;f__;g__	0	0	0	0	0	0	0	0	0	0	0	0	0	0	0	0	0	0	0
	k__Bacteria;p__Proteobacteria;c__Deltaproteobacteria;o__Desulfobacterales;f__Desulfobulbaceae;g__Desulfobulbus	0	0	0	0	0	0	0	0	0	0	0	0	0	0	0	0	0	0	0
	k__Bacteria;p__Proteobacteria;c__Deltaproteobacteria;o__Desulfobacterales;f__Nitrospinaceae;g__	0	0	0	0	0	0	0	0	0	0	0	0	0	0	0	0	0	0	0
	k__Bacteria;p__Proteobacteria;c__Deltaproteobacteria;o__Desulfovibrionales;Other;Other	0	0	0	0	0	0	0	0	0	0	0	0	0	0	0	0	0	0	0
	k__Bacteria;p__Proteobacteria;c__Deltaproteobacteria;o__Desulfovibrionales;f__Desulfovibrionaceae;Other	0	0	0	0	0	0	0	0	0	0	0	0	0	0	0	0	0	0	0
	k__Bacteria;p__Proteobacteria;c__Deltaproteobacteria;o__Desulfovibrionales;f__Desulfovibrionaceae;g__Desulfovibrio	0	0	0.001	0	0	0	0	0	0	0	0	0	0	0	0	0	0	0	0
	k__Bacteria;p__Proteobacteria;c__Deltaproteobacteria;o__Desulfuromonadales;Other;Other	0	0	0.001	0	0	0	0	0	0	0	0	0	0	0	0	0	0	0	0
	k__Bacteria;p__Proteobacteria;c__Deltaproteobacteria;o__Desulfuromonadales;f__;g__	0	0	0	0	0	0	0	0	0	0	0	0	0	0	0	0	0	0	0
	k__Bacteria;p__Proteobacteria;c__Deltaproteobacteria;o__Desulfuromonadales;f__Geobacteraceae;Other	0	0	0.002	0.001	0	0	0	0	0	0	0	0	0	0	0	0	0	0	0
	k__Bacteria;p__Proteobacteria;c__Deltaproteobacteria;o__Desulfuromonadales;f__Geobacteraceae;g__Geobacter	0	0	0.002	0.002	0	0	0	0	0	0	0	0	0	0	0	0	0	0	0
	k__Bacteria;p__Proteobacteria;c__Deltaproteobacteria;o__Desulfuromonadales;f__Pelobacteraceae;g__	0	0	0	0	0	0	0	0	0	0	0	0	0	0	0	0	0	0	0
	k__Bacteria;p__Proteobacteria;c__Deltaproteobacteria;o__FAC87;f__;g__	0	0	0.001	0	0	0	0	0	0	0	0	0	0	0	0	0	0	0	0
	k__Bacteria;p__Proteobacteria;c__Deltaproteobacteria;o__MBNT15;f__;g__	0	0	0	0	0	0	0	0	0	0	0	0	0	0	0	0	0	0	0
	k__Bacteria;p__Proteobacteria;c__Deltaproteobacteria;o__MIZ46;f__;g__	0	0	0.005	0.001	0	0	0	0	0	0	0	0	0	0	0	0	0	0	0
	k__Bacteria;p__Proteobacteria;c__Deltaproteobacteria;o__Myxococcales;Other;Other	0	0.001	0.004	0.006	0	0	0	0	0	0	0	0	0	0	0	0	0	0	0
	k__Bacteria;p__Proteobacteria;c__Deltaproteobacteria;o__Myxococcales;f__;g__	0	0.001	0.014	0.012	0	0	0	0	0	0	0	0	0	0	0	0	0	0	0
	k__Bacteria;p__Proteobacteria;c__Deltaproteobacteria;o__Myxococcales;f__0319-6G20;g__	0	0	0.001	0	0	0	0	0	0	0	0	0	0	0	0	0	0	0	0
	k__Bacteria;p__Proteobacteria;c__Deltaproteobacteria;o__Myxococcales;f__Cystobacteraceae;Other	0	0	0	0	0	0	0	0	0	0	0	0	0	0	0	0	0	0	0
	k__Bacteria;p__Proteobacteria;c__Deltaproteobacteria;o__Myxococcales;f__Cystobacteraceae;g__	0	0	0	0	0	0	0	0	0	0	0	0	0	0	0	0	0	0	0
	k__Bacteria;p__Proteobacteria;c__Deltaproteobacteria;o__Myxococcales;f__Cystobacteraceae;g__Cystobacter	0	0	0	0.001	0	0	0	0	0	0	0	0	0	0	0	0	0	0	0
	k__Bacteria;p__Proteobacteria;c__Deltaproteobacteria;o__Myxococcales;f__Cystobacterineae;g__	0	0	0	0	0	0	0	0	0	0	0	0	0	0	0	0	0	0	0
	k__Bacteria;p__Proteobacteria;c__Deltaproteobacteria;o__Myxococcales;f__Haliangiaceae;Other	0	0	0	0	0	0	0	0	0	0	0	0	0	0	0	0	0	0	0
	k__Bacteria;p__Proteobacteria;c__Deltaproteobacteria;o__Myxococcales;f__Haliangiaceae;g__	0	0	0.002	0.001	0	0	0	0	0	0	0	0	0	0	0	0	0	0	0
	k__Bacteria;p__Proteobacteria;c__Deltaproteobacteria;o__Myxococcales;f__Myxococcaceae;Other	0	0	0	0	0	0	0	0	0	0	0	0	0	0	0	0	0	0	0
	k__Bacteria;p__Proteobacteria;c__Deltaproteobacteria;o__Myxococcales;f__Myxococcaceae;g__	0	0	0	0	0	0	0	0	0	0	0	0	0	0	0	0	0	0	0
	k__Bacteria;p__Proteobacteria;c__Deltaproteobacteria;o__Myxococcales;f__Myxococcaceae;g__Anaeromyxobacter	0	0	0.001	0.001	0	0	0	0	0	0	0	0	0	0	0	0	0	0	0
	k__Bacteria;p__Proteobacteria;c__Deltaproteobacteria;o__Myxococcales;f__Nannocystaceae;g__Nannocystis	0	0	0	0	0	0	0	0	0	0	0	0	0	0	0	0	0	0	0
	k__Bacteria;p__Proteobacteria;c__Deltaproteobacteria;o__Myxococcales;f__Nannocystaceae;g__Plesiocystis	0	0	0	0	0	0	0	0	0	0	0	0	0	0	0	0	0	0	0
	k__Bacteria;p__Proteobacteria;c__Deltaproteobacteria;o__Myxococcales;f__OM27;g__	0	0	0	0	0	0	0	0	0	0	0	0	0	0	0	0	0	0	0
	k__Bacteria;p__Proteobacteria;c__Deltaproteobacteria;o__Myxococcales;f__Polyangiaceae;Other	0	0	0	0	0	0	0	0	0	0	0	0	0	0	0	0	0	0	0
	k__Bacteria;p__Proteobacteria;c__Deltaproteobacteria;o__Myxococcales;f__Polyangiaceae;g__	0	0	0	0	0	0	0	0	0	0	0	0	0	0	0	0	0	0	0
	k__Bacteria;p__Proteobacteria;c__Deltaproteobacteria;o__NB1-j;Other;Other	0	0	0	0	0	0	0	0	0	0	0	0	0	0	0	0	0	0	0
	k__Bacteria;p__Proteobacteria;c__Deltaproteobacteria;o__NB1-j;f__;g__	0	0	0	0	0	0	0	0	0	0	0	0	0	0	0	0	0	0	0
	k__Bacteria;p__Proteobacteria;c__Deltaproteobacteria;o__NB1-j;f__JTB38;g__	0	0	0	0	0	0	0	0	0	0	0	0	0	0	0	0	0	0	0
	k__Bacteria;p__Proteobacteria;c__Deltaproteobacteria;o__NB1-j;f__MND4;g__	0	0	0	0	0	0	0	0	0	0	0	0	0	0	0	0	0	0	0
	k__Bacteria;p__Proteobacteria;c__Deltaproteobacteria;o__NKB15;f__;g__	0	0	0	0	0	0	0	0	0	0	0	0	0	0	0	0	0	0	0
	k__Bacteria;p__Proteobacteria;c__Deltaproteobacteria;o__PB19;f__;g__	0	0	0	0	0	0	0	0	0	0	0	0	0	0	0	0	0	0	0
	k__Bacteria;p__Proteobacteria;c__Deltaproteobacteria;o__Spirobacillales;f__;g__	0	0	0.002	0.001	0	0	0	0	0	0	0	0	0	0	0	0	0	0	0
	k__Bacteria;p__Proteobacteria;c__Deltaproteobacteria;o__Sva0853;f__JTB36;g__	0	0	0	0	0	0	0	0	0	0	0	0	0	0	0	0	0	0	0
	k__Bacteria;p__Proteobacteria;c__Deltaproteobacteria;o__Syntrophobacterales;Other;Other	0	0	0	0	0	0	0	0	0	0	0	0	0	0	0	0	0	0	0
	k__Bacteria;p__Proteobacteria;c__Deltaproteobacteria;o__Syntrophobacterales;f__Desulfobacteraceae;g__	0	0	0	0	0	0	0	0	0	0	0	0	0	0	0	0	0	0	0
	k__Bacteria;p__Proteobacteria;c__Deltaproteobacteria;o__Syntrophobacterales;f__Desulfobacteraceae;g__Desulfobacterium	0	0	0	0	0	0	0	0	0	0	0	0	0	0	0	0	0	0	0
	k__Bacteria;p__Proteobacteria;c__Deltaproteobacteria;o__Syntrophobacterales;f__Syntrophaceae;Other	0	0	0	0	0	0	0	0	0	0	0	0	0	0	0	0	0	0	0
	k__Bacteria;p__Proteobacteria;c__Deltaproteobacteria;o__Syntrophobacterales;f__Syntrophaceae;g__	0	0	0	0	0	0	0	0	0	0	0	0	0	0	0	0	0	0	0
	k__Bacteria;p__Proteobacteria;c__Deltaproteobacteria;o__Syntrophobacterales;f__Syntrophaceae;g__Desulfobacca	0	0	0	0	0	0	0	0	0	0	0	0	0	0	0	0	0	0	0
	k__Bacteria;p__Proteobacteria;c__Deltaproteobacteria;o__Syntrophobacterales;f__Syntrophaceae;g__Desulfomonile	0	0	0	0	0	0	0	0	0	0	0	0	0	0	0	0	0	0	0
	k__Bacteria;p__Proteobacteria;c__Deltaproteobacteria;o__Syntrophobacterales;f__Syntrophaceae;g__Syntrophus	0	0	0	0	0	0	0	0	0	0	0	0	0	0	0	0	0	0	0
	k__Bacteria;p__Proteobacteria;c__Deltaproteobacteria;o__Syntrophobacterales;f__Syntrophobacteraceae;g__	0	0	0.001	0.001	0	0	0	0	0	0	0	0	0	0	0	0	0	0	0
	k__Bacteria;p__Proteobacteria;c__Deltaproteobacteria;o__Syntrophobacterales;f__Syntrophobacteraceae;g__Syntrophobacter	0	0	0	0	0	0	0	0	0	0	0	0	0	0	0	0	0	0	0
	k__Bacteria;p__Proteobacteria;c__Deltaproteobacteria;o__Syntrophobacterales;f__Syntrophorhabdaceae;g__	0	0	0	0	0	0	0	0	0	0	0	0	0	0	0	0	0	0	0
	k__Bacteria;p__Proteobacteria;c__Deltaproteobacteria;o__[Entotheonellales];f__;g__	0	0	0	0	0	0	0	0	0	0	0	0	0	0	0	0	0	0	0
	k__Bacteria;p__Proteobacteria;c__Deltaproteobacteria;o__[Entotheonellales];f__[Entotheonellaceae];g__	0	0	0	0	0	0	0	0	0	0	0	0	0	0	0	0	0	0	0
	k__Bacteria;p__Proteobacteria;c__Epsilonproteobacteria;o__Campylobacterales;Other;Other	0	0	0	0	0	0	0	0	0	0	0	0	0	0	0	0	0	0	0
	k__Bacteria;p__Proteobacteria;c__Epsilonproteobacteria;o__Campylobacterales;f__Campylobacteraceae;Other	0	0	0	0	0	0	0	0	0	0	0	0	0	0	0	0	0	0	0
	k__Bacteria;p__Proteobacteria;c__Epsilonproteobacteria;o__Campylobacterales;f__Campylobacteraceae;g__Arcobacter	0	0.001	0.006	0.014	0	0	0	0	0	0	0	0	0	0	0	0	0	0	0
	k__Bacteria;p__Proteobacteria;c__Epsilonproteobacteria;o__Campylobacterales;f__Campylobacteraceae;g__Campylobacter	0	0	0	0	0	0	0	0	0	0	0	0	0	0	0	0	0	0	0
	k__Bacteria;p__Proteobacteria;c__Epsilonproteobacteria;o__Campylobacterales;f__Campylobacteraceae;g__Sulfurospirillum	0	0	0	0	0	0	0	0	0	0	0	0	0	0	0	0	0	0	0
	k__Bacteria;p__Proteobacteria;c__Epsilonproteobacteria;o__Campylobacterales;f__Helicobacteraceae;g__	0	0	0	0	0	0	0	0	0	0	0	0	0	0	0	0	0	0	0
	k__Bacteria;p__Proteobacteria;c__Gammaproteobacteria;Other;Other;Other	0	0.004	0.034	0.04	0	0	0	0	0	0	0	0	0	0	0	0	0	0	0
	k__Bacteria;p__Proteobacteria;c__Gammaproteobacteria;o__Aeromonadales;Other;Other	0	0	0	0.001	0	0	0	0	0	0	0	0	0	0	0	0	0	0	0
	k__Bacteria;p__Proteobacteria;c__Gammaproteobacteria;o__Aeromonadales;f__;g__	0	0	0	0.002	0	0	0	0	0	0	0	0	0	0	0	0	0	0	0
	k__Bacteria;p__Proteobacteria;c__Gammaproteobacteria;o__Aeromonadales;f__Aeromonadaceae;Other	0	0	0.001	0.002	0	0	0	0	0	0	0	0	0	0	0	0	0	0	0
	k__Bacteria;p__Proteobacteria;c__Gammaproteobacteria;o__Aeromonadales;f__Aeromonadaceae;g__	0	0.001	0.002	0.018	0	0	0	0	0	0	0	0	0	0	0	0	0	0	0
	k__Bacteria;p__Proteobacteria;c__Gammaproteobacteria;o__Aeromonadales;f__Aeromonadaceae;g__Tolumonas	0	0	0.002	0.006	0	0	0	0	0	0	0	0	0	0	0	0	0	0	0
	k__Bacteria;p__Proteobacteria;c__Gammaproteobacteria;o__Alteromonadales;Other;Other	0	0	0	0	0	0	0	0	0	0	0	0	0	0	0	0	0	0	0
	k__Bacteria;p__Proteobacteria;c__Gammaproteobacteria;o__Alteromonadales;f__125ds10;g__	0	0	0	0	0	0	0	0	0	0	0	0	0	0	0	0	0	0	0
	k__Bacteria;p__Proteobacteria;c__Gammaproteobacteria;o__Alteromonadales;f__Alteromonadaceae;Other	0	0	0	0.001	0	0	0	0	0	0	0	0	0	0	0	0	0	0	0
	k__Bacteria;p__Proteobacteria;c__Gammaproteobacteria;o__Alteromonadales;f__Alteromonadaceae;g__Cellvibrio	0	0	0.004	0.004	0	0	0	0	0	0	0	0	0	0	0	0	0	0	0
	k__Bacteria;p__Proteobacteria;c__Gammaproteobacteria;o__Alteromonadales;f__Shewanellaceae;g__Shewanella	0	0	0	0.006	0	0	0	0	0	0	0	0	0	0	0	0	0	0	0
	k__Bacteria;p__Proteobacteria;c__Gammaproteobacteria;o__Alteromonadales;f__[Chromatiaceae];Other	0	0	0	0	0	0	0	0	0	0	0	0	0	0	0	0	0	0	0
	k__Bacteria;p__Proteobacteria;c__Gammaproteobacteria;o__Alteromonadales;f__[Chromatiaceae];g__Rheinheimera	0	0	0.001	0.001	0	0	0	0	0	0	0	0	0	0	0	0	0	0	0
	k__Bacteria;p__Proteobacteria;c__Gammaproteobacteria;o__Cardiobacteriales;Other;Other	0	0	0	0	0	0	0	0	0	0	0	0	0	0	0	0	0	0	0
	k__Bacteria;p__Proteobacteria;c__Gammaproteobacteria;o__Cardiobacteriales;f__Cardiobacteriaceae;g__	0	0	0	0	0	0	0	0	0	0	0	0	0	0	0	0	0	0	0
	k__Bacteria;p__Proteobacteria;c__Gammaproteobacteria;o__Cardiobacteriales;f__Cardiobacteriaceae;g__Cardiobacterium	0	0	0	0	0	0	0	0	0	0	0	0	0	0	0	0	0	0	0
	k__Bacteria;p__Proteobacteria;c__Gammaproteobacteria;o__Chromatiales;f__;g__	0	0	0	0	0	0	0	0	0	0	0	0	0	0	0	0	0	0	0
	k__Bacteria;p__Proteobacteria;c__Gammaproteobacteria;o__Chromatiales;f__Ectothiorhodospiraceae;Other	0	0	0	0	0	0	0	0	0	0	0	0	0	0	0	0	0	0	0
	k__Bacteria;p__Proteobacteria;c__Gammaproteobacteria;o__Chromatiales;f__Ectothiorhodospiraceae;g__	0	0	0	0	0	0	0	0	0	0	0	0	0	0	0	0	0	0	0
	k__Bacteria;p__Proteobacteria;c__Gammaproteobacteria;o__Enterobacteriales;f__Enterobacteriaceae;Other	0	0.002	0.008	0.008	0.002	0	0	0.008	0.002	0	0	0	0	0	0.001	0.001	0	0	0
	k__Bacteria;p__Proteobacteria;c__Gammaproteobacteria;o__Enterobacteriales;f__Enterobacteriaceae;g__Candidatus Phlomobacter	0	0	0.002	0	0	0	0	0	0	0	0	0	0	0	0	0	0	0	0
	k__Bacteria;p__Proteobacteria;c__Gammaproteobacteria;o__Enterobacteriales;f__Enterobacteriaceae;g__Dickeya	0	0	0.003	0.002	0	0	0	0	0	0	0	0	0	0	0	0	0	0	0
	k__Bacteria;p__Proteobacteria;c__Gammaproteobacteria;o__Enterobacteriales;f__Enterobacteriaceae;g__Edwardsiella	0	0	0	0	0	0	0	0	0	0	0	0	0	0	0	0	0	0	0
	k__Bacteria;p__Proteobacteria;c__Gammaproteobacteria;o__Enterobacteriales;f__Enterobacteriaceae;g__Erwinia	0	0	0	0	0.001	0	0	0	0	0	0	0	0	0	0	0	0	0	0
	k__Bacteria;p__Proteobacteria;c__Gammaproteobacteria;o__Enterobacteriales;f__Enterobacteriaceae;g__Morganella	0	0	0	0	0	0	0	0	0	0	0	0	0	0	0	0	0	0	0
	k__Bacteria;p__Proteobacteria;c__Gammaproteobacteria;o__Enterobacteriales;f__Enterobacteriaceae;g__Plesiomonas	0	0	0	0	0	0	0	0	0	0	0	0	0	0	0	0	0	0	0
	k__Bacteria;p__Proteobacteria;c__Gammaproteobacteria;o__Enterobacteriales;f__Enterobacteriaceae;g__Providencia	0	0	0	0	0	0	0	0	0	0	0	0	0	0	0	0	0	0	0
	k__Bacteria;p__Proteobacteria;c__Gammaproteobacteria;o__Enterobacteriales;f__Enterobacteriaceae;g__Serratia	0	0	0	0	0	0	0	0	0	0	0	0	0	0	0	0	0	0	0
	k__Bacteria;p__Proteobacteria;c__Gammaproteobacteria;o__Enterobacteriales;f__Enterobacteriaceae;g__Trabulsiella	0	0	0	0	0	0	0	0	0	0	0	0	0	0	0	0	0	0	0
	k__Bacteria;p__Proteobacteria;c__Gammaproteobacteria;o__FCPT525;f__;g__	0	0	0	0	0	0	0	0	0	0	0	0	0	0	0	0	0	0	0
	k__Bacteria;p__Proteobacteria;c__Gammaproteobacteria;o__FCPT525;f__FCPT525;g__	0	0	0	0	0	0	0	0	0	0	0	0	0	0	0	0	0	0	0
	k__Bacteria;p__Proteobacteria;c__Gammaproteobacteria;o__HTCC2188;f__211ds20;g__	0	0	0.003	0.001	0	0	0	0	0	0	0	0	0	0	0	0	0	0	0
	k__Bacteria;p__Proteobacteria;c__Gammaproteobacteria;o__HTCC2188;f__HTCC2089;g__	0	0	0	0	0	0	0	0	0	0	0	0	0	0	0	0	0	0	0
	k__Bacteria;p__Proteobacteria;c__Gammaproteobacteria;o__Legionellales;Other;Other	0	0	0.002	0	0	0	0	0	0	0	0	0	0	0	0	0	0	0	0
	k__Bacteria;p__Proteobacteria;c__Gammaproteobacteria;o__Legionellales;f__;g__	0	0	0.002	0	0	0	0	0	0	0	0	0	0	0	0	0	0	0	0
	k__Bacteria;p__Proteobacteria;c__Gammaproteobacteria;o__Legionellales;f__Coxiellaceae;Other	0	0	0	0	0	0	0	0	0	0	0	0	0	0	0	0	0	0	0
	k__Bacteria;p__Proteobacteria;c__Gammaproteobacteria;o__Legionellales;f__Coxiellaceae;g__	0	0	0.001	0	0	0	0	0	0	0	0	0	0	0	0	0	0	0	0
	k__Bacteria;p__Proteobacteria;c__Gammaproteobacteria;o__Legionellales;f__Coxiellaceae;g__Aquicella	0	0	0.001	0	0	0	0	0	0	0	0	0	0	0	0	0	0	0	0
	k__Bacteria;p__Proteobacteria;c__Gammaproteobacteria;o__Legionellales;f__Coxiellaceae;g__Coxiella	0	0	0	0	0	0	0	0	0	0	0	0	0	0	0	0	0	0	0
	k__Bacteria;p__Proteobacteria;c__Gammaproteobacteria;o__Legionellales;f__Coxiellaceae;g__Rickettsiella	0	0	0.001	0	0	0	0	0	0	0	0	0	0	0	0	0	0	0	0
	k__Bacteria;p__Proteobacteria;c__Gammaproteobacteria;o__Legionellales;f__Francisellaceae;g__	0	0	0	0	0	0	0	0	0	0	0	0	0	0	0	0	0	0	0
	k__Bacteria;p__Proteobacteria;c__Gammaproteobacteria;o__Legionellales;f__Legionellaceae;Other	0	0	0	0	0	0	0	0	0	0	0	0	0	0	0	0	0	0	0
	k__Bacteria;p__Proteobacteria;c__Gammaproteobacteria;o__Legionellales;f__Legionellaceae;g__	0	0	0	0	0	0	0	0	0	0	0	0	0	0	0	0	0	0	0
	k__Bacteria;p__Proteobacteria;c__Gammaproteobacteria;o__Legionellales;f__Legionellaceae;g__Legionella	0	0	0	0	0	0	0	0	0	0	0	0	0	0	0	0	0	0	0
	k__Bacteria;p__Proteobacteria;c__Gammaproteobacteria;o__Methylococcales;Other;Other	0	0	0.004	0.001	0	0	0	0	0	0	0	0	0	0	0	0	0	0	0
	k__Bacteria;p__Proteobacteria;c__Gammaproteobacteria;o__Methylococcales;f__Crenotrichaceae;g__Crenothrix	0	0.001	0.008	0.004	0	0	0	0	0	0	0	0	0	0	0	0	0	0	0
	k__Bacteria;p__Proteobacteria;c__Gammaproteobacteria;o__Methylococcales;f__Methylococcaceae;Other	0	0	0.002	0.001	0	0	0	0	0	0	0	0	0	0	0	0	0	0	0
	k__Bacteria;p__Proteobacteria;c__Gammaproteobacteria;o__Methylococcales;f__Methylococcaceae;g__	0	0	0	0	0	0	0	0	0	0	0	0	0	0	0	0	0	0	0
	k__Bacteria;p__Proteobacteria;c__Gammaproteobacteria;o__Methylococcales;f__Methylococcaceae;g__Methylocaldum	0	0	0.001	0	0	0	0	0	0	0	0	0	0	0	0	0	0	0	0
	k__Bacteria;p__Proteobacteria;c__Gammaproteobacteria;o__Methylococcales;f__Methylococcaceae;g__Methylomicrobium	0	0	0	0.001	0	0	0	0	0	0	0	0	0	0	0	0	0	0	0
	k__Bacteria;p__Proteobacteria;c__Gammaproteobacteria;o__Methylococcales;f__Methylococcaceae;g__Methylomonas	0	0	0.002	0.001	0	0	0	0	0	0	0	0	0	0	0	0	0	0	0
	k__Bacteria;p__Proteobacteria;c__Gammaproteobacteria;o__Oceanospirillales;Other;Other	0	0	0	0	0	0	0	0	0	0	0	0	0	0	0	0	0	0	0
	k__Bacteria;p__Proteobacteria;c__Gammaproteobacteria;o__Oceanospirillales;f__Alcanivoracaceae;g__	0	0	0	0	0	0	0	0	0	0	0	0	0	0	0	0	0	0	0
	k__Bacteria;p__Proteobacteria;c__Gammaproteobacteria;o__Oceanospirillales;f__Halomonadaceae;Other	0	0	0	0	0	0	0	0	0	0	0	0	0	0	0	0	0	0	0
	k__Bacteria;p__Proteobacteria;c__Gammaproteobacteria;o__Oceanospirillales;f__Halomonadaceae;g__Halomonas	0	0	0	0	0	0	0	0	0	0	0	0	0	0	0	0	0	0	0
	k__Bacteria;p__Proteobacteria;c__Gammaproteobacteria;o__Oceanospirillales;f__Halomonadaceae;g__Kushneria	0	0	0	0	0	0	0	0	0	0	0	0	0	0	0	0	0	0	0
	k__Bacteria;p__Proteobacteria;c__Gammaproteobacteria;o__Oceanospirillales;f__Oleiphilaceae;g__	0	0	0	0	0	0	0	0	0	0	0	0	0	0	0	0	0	0	0
	k__Bacteria;p__Proteobacteria;c__Gammaproteobacteria;o__Pasteurellales;f__;g__	0	0	0.001	0	0	0	0	0	0	0	0	0	0	0	0	0	0	0	0
	k__Bacteria;p__Proteobacteria;c__Gammaproteobacteria;o__Pasteurellales;f__Pasteurellaceae;Other	0	0	0	0	0.001	0	0	0	0	0	0	0	0	0	0	0	0	0	0
	k__Bacteria;p__Proteobacteria;c__Gammaproteobacteria;o__Pasteurellales;f__Pasteurellaceae;g__Actinobacillus	0	0	0	0	0	0	0	0	0	0	0	0	0	0	0	0	0	0	0
	k__Bacteria;p__Proteobacteria;c__Gammaproteobacteria;o__Pasteurellales;f__Pasteurellaceae;g__Aggregatibacter	0	0	0	0	0.001	0	0	0	0	0	0	0	0	0	0	0	0	0	0
	k__Bacteria;p__Proteobacteria;c__Gammaproteobacteria;o__Pasteurellales;f__Pasteurellaceae;g__Chelonobacter	0	0	0	0	0	0	0	0	0	0	0	0	0	0	0	0	0	0	0
	k__Bacteria;p__Proteobacteria;c__Gammaproteobacteria;o__Pasteurellales;f__Pasteurellaceae;g__Haemophilus	0	0	0	0	0.003	0	0	0	0	0	0	0	0	0	0	0	0	0	0
	k__Bacteria;p__Proteobacteria;c__Gammaproteobacteria;o__Pseudomonadales;Other;Other	0	0	0	0.001	0	0	0	0	0	0	0	0	0	0	0	0	0	0	0
	k__Bacteria;p__Proteobacteria;c__Gammaproteobacteria;o__Pseudomonadales;f__Moraxellaceae;Other	0	0	0.001	0.003	0	0	0	0	0	0	0	0	0	0	0	0	0	0	0
	k__Bacteria;p__Proteobacteria;c__Gammaproteobacteria;o__Pseudomonadales;f__Moraxellaceae;g__	0	0	0	0	0	0	0	0	0	0	0	0	0	0	0	0	0	0	0
	k__Bacteria;p__Proteobacteria;c__Gammaproteobacteria;o__Pseudomonadales;f__Moraxellaceae;g__Acinetobacter	0	0.013	0.004	0.229	0.001	0	0	0	0.003	0	0	0	0	0.002	0.001	0.001	0	0	0
	k__Bacteria;p__Proteobacteria;c__Gammaproteobacteria;o__Pseudomonadales;f__Moraxellaceae;g__Alkanindiges	0	0	0.001	0.001	0	0	0.001	0	0	0	0	0	0	0	0	0	0	0	0
	k__Bacteria;p__Proteobacteria;c__Gammaproteobacteria;o__Pseudomonadales;f__Moraxellaceae;g__Enhydrobacter	0	0	0	0.002	0	0	0	0	0	0	0	0	0	0	0	0	0	0	0
	k__Bacteria;p__Proteobacteria;c__Gammaproteobacteria;o__Pseudomonadales;f__Moraxellaceae;g__Moraxella	0	0	0	0	0	0	0	0	0	0	0	0	0	0	0	0	0	0	0
	k__Bacteria;p__Proteobacteria;c__Gammaproteobacteria;o__Pseudomonadales;f__Moraxellaceae;g__Psychrobacter	0	0	0	0	0	0	0	0	0	0	0	0	0	0	0	0	0	0	0
	k__Bacteria;p__Proteobacteria;c__Gammaproteobacteria;o__Pseudomonadales;f__Pseudomonadaceae;Other	0	0	0.001	0.002	0	0	0	0.001	0	0	0	0	0	0	0.001	0	0	0	0
	k__Bacteria;p__Proteobacteria;c__Gammaproteobacteria;o__Pseudomonadales;f__Pseudomonadaceae;g__	0	0	0	0.002	0	0	0	0	0	0	0	0	0	0	0	0	0	0	0
	k__Bacteria;p__Proteobacteria;c__Gammaproteobacteria;o__Pseudomonadales;f__Pseudomonadaceae;g__Pseudomonas	0	0.003	0.002	0.006	0	0	0.006	0.006	0.005	0.003	0	0	0.004	0	0.011	0.004	0	0.004	0
	k__Bacteria;p__Proteobacteria;c__Gammaproteobacteria;o__Thiotrichales;f__Thiotrichaceae;g__Thiothrix	0	0	0	0	0	0	0	0	0	0	0	0	0	0	0	0	0	0	0
	k__Bacteria;p__Proteobacteria;c__Gammaproteobacteria;o__Vibrionales;f__Vibrionaceae;g__Vibrio	0	0	0	0	0	0	0	0	0	0	0	0	0	0	0	0	0	0	0
	k__Bacteria;p__Proteobacteria;c__Gammaproteobacteria;o__Xanthomonadales;Other;Other	0	0	0	0	0	0	0	0	0	0	0	0	0	0	0	0	0	0	0
	k__Bacteria;p__Proteobacteria;c__Gammaproteobacteria;o__Xanthomonadales;f__;g__	0	0	0.001	0	0	0	0	0	0	0	0	0	0	0	0	0	0	0	0
	k__Bacteria;p__Proteobacteria;c__Gammaproteobacteria;o__Xanthomonadales;f__Sinobacteraceae;Other	0	0	0.001	0	0	0	0	0	0	0	0	0	0	0	0	0	0	0	0
	k__Bacteria;p__Proteobacteria;c__Gammaproteobacteria;o__Xanthomonadales;f__Sinobacteraceae;g__	0	0	0.005	0.004	0	0	0	0	0	0	0	0	0	0	0	0	0	0	0
	k__Bacteria;p__Proteobacteria;c__Gammaproteobacteria;o__Xanthomonadales;f__Sinobacteraceae;g__Steroidobacter	0	0	0.001	0	0	0	0	0	0	0	0	0	0	0	0	0	0	0	0
	k__Bacteria;p__Proteobacteria;c__Gammaproteobacteria;o__Xanthomonadales;f__Xanthomonadaceae;Other	0	0	0.001	0.001	0	0	0	0.001	0	0.001	0	0	0.001	0	0.002	0	0	0	0
	k__Bacteria;p__Proteobacteria;c__Gammaproteobacteria;o__Xanthomonadales;f__Xanthomonadaceae;g__	0	0	0	0	0	0	0	0	0	0	0	0	0	0	0	0	0	0	0
	k__Bacteria;p__Proteobacteria;c__Gammaproteobacteria;o__Xanthomonadales;f__Xanthomonadaceae;g__Dokdonella	0	0	0	0	0	0	0	0	0	0	0	0	0	0	0	0	0	0	0
	k__Bacteria;p__Proteobacteria;c__Gammaproteobacteria;o__Xanthomonadales;f__Xanthomonadaceae;g__Lysobacter	0	0	0	0	0	0	0	0	0	0	0	0	0	0	0	0	0	0	0
	k__Bacteria;p__Proteobacteria;c__Gammaproteobacteria;o__Xanthomonadales;f__Xanthomonadaceae;g__Pseudoxanthomonas	0	0	0	0	0	0	0	0	0	0	0	0	0	0	0	0	0	0	0
	k__Bacteria;p__Proteobacteria;c__Gammaproteobacteria;o__Xanthomonadales;f__Xanthomonadaceae;g__Rhodanobacter	0	0	0	0	0	0	0	0	0	0	0	0	0	0.001	0	0.001	0	0	0
	k__Bacteria;p__Proteobacteria;c__Gammaproteobacteria;o__Xanthomonadales;f__Xanthomonadaceae;g__Stenotrophomonas	0	0.001	0	0	0	0	0	0.002	0	0	0	0	0.002	0	0.004	0	0	0.001	0
	k__Bacteria;p__Proteobacteria;c__Gammaproteobacteria;o__Xanthomonadales;f__Xanthomonadaceae;g__Xylella	0	0	0	0	0	0	0	0	0	0	0	0	0	0	0	0	0	0	0
	k__Bacteria;p__SR1;c__;o__;f__;g__	0	0	0.001	0	0	0	0	0	0	0	0	0	0	0	0	0	0	0	0
	k__Bacteria;p__Spirochaetes;c__MVP-15;o__PL-11B10;f__;g__	0	0	0	0	0	0	0	0	0	0	0	0	0	0	0	0	0	0	0
	k__Bacteria;p__Spirochaetes;c__Spirochaetes;Other;Other;Other	0	0	0	0	0	0	0	0	0	0	0	0	0	0	0	0	0	0	0
	k__Bacteria;p__Spirochaetes;c__Spirochaetes;o__M2PT2-76;f__;g__	0	0	0	0	0	0	0	0	0	0	0	0	0	0	0	0	0	0	0
	k__Bacteria;p__Spirochaetes;c__Spirochaetes;o__Spirochaetales;f__Spirochaetaceae;Other	0	0	0	0	0	0	0	0	0	0	0	0	0	0	0	0	0	0	0
	k__Bacteria;p__Spirochaetes;c__Spirochaetes;o__Spirochaetales;f__Spirochaetaceae;g__Spirochaeta	0	0	0.001	0.001	0	0	0	0	0	0	0	0	0	0	0	0	0	0	0
	k__Bacteria;p__Spirochaetes;c__Spirochaetes;o__Spirochaetales;f__Spirochaetaceae;g__Treponema	0	0	0	0	0	0	0	0	0	0	0	0	0	0	0	0	0	0	0
	k__Bacteria;p__Spirochaetes;c__Spirochaetes;o__[Borreliales];f__[Borreliaceae];g__Spironema	0	0	0	0	0	0	0	0	0	0	0	0	0	0	0	0	0	0	0
	k__Bacteria;p__Spirochaetes;c__WWE1;o__[Cloacamonales];f__CW-1;g__	0	0	0	0	0	0	0	0	0	0	0	0	0	0	0	0	0	0	0
	k__Bacteria;p__Spirochaetes;c__[Brachyspirae];o__[Brachyspirales];f__Brachyspiraceae;g__	0	0	0	0	0	0	0	0	0	0	0	0	0	0	0	0	0	0	0
	k__Bacteria;p__Spirochaetes;c__[Brevinematae];o__[Brevinematales];f__;g__	0	0	0	0	0	0	0	0	0	0	0	0	0	0	0	0	0	0	0
	k__Bacteria;p__Spirochaetes;c__[Leptospirae];o__[Leptospirales];Other;Other	0	0	0	0	0	0	0	0	0	0	0	0	0	0	0	0	0	0	0
	k__Bacteria;p__Spirochaetes;c__[Leptospirae];o__[Leptospirales];f__Leptospiraceae;g__	0	0	0	0	0	0	0	0	0	0	0	0	0	0	0	0	0	0	0
	k__Bacteria;p__Spirochaetes;c__[Leptospirae];o__[Leptospirales];f__Sediment-4;Other	0	0	0	0	0	0	0	0	0	0	0	0	0	0	0	0	0	0	0
	k__Bacteria;p__Spirochaetes;c__[Leptospirae];o__[Leptospirales];f__Sediment-4;g__	0	0	0	0	0	0	0	0	0	0	0	0	0	0	0	0	0	0	0
	k__Bacteria;p__Synergistetes;c__Synergistia;o__Synergistales;f__Dethiosulfovibrionaceae;g__TG5	0	0	0	0	0	0	0	0	0	0	0	0	0	0	0	0	0	0	0
	k__Bacteria;p__TM6;Other;Other;Other;Other	0	0	0	0	0	0	0	0	0	0	0	0	0	0	0	0	0	0	0
	k__Bacteria;p__TM6;c__SBRH58;o__;f__;g__	0	0	0.001	0	0	0	0	0	0	0	0	0	0	0	0	0	0	0	0
	k__Bacteria;p__TM6;c__SJA-4;o__;f__;g__	0	0	0.002	0	0	0	0	0	0	0	0	0	0	0	0	0	0	0	0
	k__Bacteria;p__TM7;c__SC3;o__;f__;g__	0	0	0.001	0	0	0	0	0	0	0	0	0	0	0	0	0	0	0	0
	k__Bacteria;p__TM7;c__TM7-1;o__;f__;g__	0	0	0	0	0	0	0	0	0	0	0	0	0	0	0	0	0	0	0
	k__Bacteria;p__TM7;c__TM7-3;Other;Other;Other	0	0	0	0	0	0	0	0	0	0	0	0	0	0	0	0	0	0	0
	k__Bacteria;p__TM7;c__TM7-3;o__;f__;g__	0	0	0	0	0	0	0	0	0	0	0	0	0	0	0	0	0	0	0
	k__Bacteria;p__Tenericutes;c__Mollicutes;Other;Other;Other	0	0	0	0	0	0	0	0	0	0	0	0	0	0	0	0	0	0	0
	k__Bacteria;p__Tenericutes;c__Mollicutes;o__Acholeplasmatales;f__Acholeplasmataceae;g__Acholeplasma	0	0	0	0	0	0	0	0	0	0	0	0	0	0	0	0	0	0	0
	k__Bacteria;p__Tenericutes;c__Mollicutes;o__Anaeroplasmatales;f__Anaeroplasmataceae;g__	0	0	0.001	0	0	0	0	0	0	0	0	0	0	0	0	0	0	0	0
	k__Bacteria;p__Tenericutes;c__Mollicutes;o__Anaeroplasmatales;f__Anaeroplasmataceae;g__Asteroleplasma	0	0	0	0	0	0	0	0	0	0	0	0	0	0	0	0	0	0	0
	k__Bacteria;p__Tenericutes;c__Mollicutes;o__Anaeroplasmatales;f__Anaeroplasmataceae;g__RFN20	0	0	0	0	0	0	0	0	0	0	0	0	0	0	0	0	0	0	0
	k__Bacteria;p__Tenericutes;c__Mollicutes;o__Entomoplasmatales;Other;Other	0	0	0	0	0	0	0	0	0	0	0	0	0	0	0	0	0	0	0
	k__Bacteria;p__Tenericutes;c__Mollicutes;o__Entomoplasmatales;f__;g__	0	0	0	0	0	0	0	0	0	0	0	0	0	0	0	0	0	0	0
	k__Bacteria;p__Tenericutes;c__Mollicutes;o__Entomoplasmatales;f__Entomoplasmataceae;g__Entomoplasma	0	0	0	0	0	0	0	0	0	0	0	0	0	0	0	0	0	0	0
	k__Bacteria;p__Tenericutes;c__Mollicutes;o__Mycoplasmatales;f__;g__	0	0	0.003	0	0	0	0	0	0	0	0	0	0	0	0	0	0	0	0
	k__Bacteria;p__Tenericutes;c__Mollicutes;o__Mycoplasmatales;f__Mycoplasmataceae;g__Mycoplasma	0	0	0.001	0	0	0	0	0	0	0	0	0	0	0	0	0	0	0	0
	k__Bacteria;p__Tenericutes;c__Mollicutes;o__RF39;f__;g__	0	0	0	0	0	0	0	0	0	0	0	0	0	0	0	0	0	0	0
	k__Bacteria;p__Tenericutes;c__Mollicutes;o__RsaHF231;f__;g__	0	0	0	0	0	0	0	0	0	0	0	0	0	0	0	0	0	0	0
	k__Bacteria;p__Thermi;c__Deinococci;o__Deinococcales;f__Deinococcaceae;g__Deinococcus	0	0	0	0	0	0	0	0	0	0	0	0	0	0	0	0	0	0	0
	k__Bacteria;p__Verrucomicrobia;Other;Other;Other;Other	0	0	0	0	0	0	0	0	0	0	0	0	0	0	0	0	0	0	0
	k__Bacteria;p__Verrucomicrobia;c__Opitutae;Other;Other;Other	0	0	0	0	0	0	0	0	0	0	0	0	0	0	0	0	0	0	0
	k__Bacteria;p__Verrucomicrobia;c__Opitutae;o__Opitutales;Other;Other	0	0	0	0	0	0	0	0	0	0	0	0	0	0	0	0	0	0	0
	k__Bacteria;p__Verrucomicrobia;c__Opitutae;o__Opitutales;f__;g__	0	0	0	0	0	0	0	0	0	0	0	0	0	0	0	0	0	0	0
	k__Bacteria;p__Verrucomicrobia;c__Opitutae;o__Opitutales;f__Opitutaceae;Other	0	0	0	0.001	0	0	0	0	0	0	0	0	0	0	0	0	0	0	0
	k__Bacteria;p__Verrucomicrobia;c__Opitutae;o__Opitutales;f__Opitutaceae;g__	0	0	0.002	0.001	0	0	0	0	0	0	0	0	0	0	0	0	0	0	0
	k__Bacteria;p__Verrucomicrobia;c__Opitutae;o__Opitutales;f__Opitutaceae;g__Opitutus	0	0	0.002	0.001	0	0	0	0	0	0	0	0	0	0	0	0	0	0	0
	k__Bacteria;p__Verrucomicrobia;c__Opitutae;o__[Cerasicoccales];f__[Cerasicoccaceae];g__	0	0	0	0	0	0	0	0	0	0	0	0	0	0	0	0	0	0	0
	k__Bacteria;p__Verrucomicrobia;c__Verruco-5;o__LD1-PB3;f__;g__	0	0	0	0	0	0	0	0	0	0	0	0	0	0	0	0	0	0	0
	k__Bacteria;p__Verrucomicrobia;c__Verruco-5;o__WCHB1-41;f__;g__	0	0	0	0	0	0	0	0	0	0	0	0	0	0	0	0	0	0	0
	k__Bacteria;p__Verrucomicrobia;c__Verruco-5;o__WCHB1-41;f__RFP12;g__	0	0	0	0	0	0	0	0	0	0	0	0	0	0	0	0	0	0	0
	k__Bacteria;p__Verrucomicrobia;c__Verrucomicrobiae;o__Verrucomicrobiales;f__Verrucomicrobiaceae;g__	0	0	0	0	0	0	0	0	0	0	0	0	0	0	0	0	0	0	0
	k__Bacteria;p__Verrucomicrobia;c__Verrucomicrobiae;o__Verrucomicrobiales;f__Verrucomicrobiaceae;g__Luteolibacter	0	0	0	0	0	0	0	0	0	0	0	0	0	0	0	0	0	0	0
	k__Bacteria;p__Verrucomicrobia;c__Verrucomicrobiae;o__Verrucomicrobiales;f__Verrucomicrobiaceae;g__Prosthecobacter	0	0	0	0	0	0	0	0	0	0	0	0	0	0	0	0	0	0	0
	k__Bacteria;p__Verrucomicrobia;c__Verrucomicrobiae;o__Verrucomicrobiales;f__Verrucomicrobiaceae;g__Verrucomicrobium	0	0	0	0	0	0	0	0	0	0	0	0	0	0	0	0	0	0	0
	k__Bacteria;p__Verrucomicrobia;c__[Methylacidiphilae];o__Methylacidiphilales;Other;Other	0	0	0	0	0	0	0	0	0	0	0	0	0	0	0	0	0	0	0
	k__Bacteria;p__Verrucomicrobia;c__[Methylacidiphilae];o__Methylacidiphilales;f__LD19;g__	0	0	0	0	0	0	0	0	0	0	0	0	0	0	0	0	0	0	0
	k__Bacteria;p__Verrucomicrobia;c__[Methylacidiphilae];o__S-BQ2-57;f__;g__	0	0	0	0	0	0	0	0	0	0	0	0	0	0	0	0	0	0	0
	k__Bacteria;p__Verrucomicrobia;c__[Pedosphaerae];Other;Other;Other	0	0	0	0	0	0	0	0	0	0	0	0	0	0	0	0	0	0	0
	k__Bacteria;p__Verrucomicrobia;c__[Pedosphaerae];o__[Pedosphaerales];Other;Other	0	0	0.002	0.001	0	0	0	0	0	0	0	0	0	0	0	0	0	0	0
	k__Bacteria;p__Verrucomicrobia;c__[Pedosphaerae];o__[Pedosphaerales];f__;g__	0	0	0.001	0	0	0	0	0	0	0	0	0	0	0	0	0	0	0	0
	k__Bacteria;p__Verrucomicrobia;c__[Pedosphaerae];o__[Pedosphaerales];f__Ellin515;g__	0	0	0.001	0	0	0	0	0	0	0	0	0	0	0	0	0	0	0	0
	k__Bacteria;p__Verrucomicrobia;c__[Pedosphaerae];o__[Pedosphaerales];f__Ellin517;g__	0	0	0	0	0	0	0	0	0	0	0	0	0	0	0	0	0	0	0
	k__Bacteria;p__Verrucomicrobia;c__[Pedosphaerae];o__[Pedosphaerales];f__R4-41B;g__	0	0	0	0	0	0	0	0	0	0	0	0	0	0	0	0	0	0	0
	k__Bacteria;p__Verrucomicrobia;c__[Pedosphaerae];o__[Pedosphaerales];f__[Pedosphaeraceae];Other	0	0	0	0	0	0	0	0	0	0	0	0	0	0	0	0	0	0	0
	k__Bacteria;p__Verrucomicrobia;c__[Pedosphaerae];o__[Pedosphaerales];f__[Pedosphaeraceae];g__	0	0	0	0	0	0	0	0	0	0	0	0	0	0	0	0	0	0	0
	k__Bacteria;p__Verrucomicrobia;c__[Pedosphaerae];o__[Pedosphaerales];f__auto67_4W;g__	0	0	0.002	0.001	0	0	0	0	0	0	0	0	0	0	0	0	0	0	0
	k__Bacteria;p__Verrucomicrobia;c__[Spartobacteria];o__[Chthoniobacterales];Other;Other	0	0	0	0	0	0	0	0	0	0	0	0	0	0	0	0	0	0	0
	k__Bacteria;p__Verrucomicrobia;c__[Spartobacteria];o__[Chthoniobacterales];f__[Chthoniobacteraceae];Other	0	0	0	0	0	0	0	0	0	0	0	0	0	0	0	0	0	0	0
	k__Bacteria;p__Verrucomicrobia;c__[Spartobacteria];o__[Chthoniobacterales];f__[Chthoniobacteraceae];g__	0	0	0	0	0	0	0	0	0	0	0	0	0	0	0	0	0	0	0
	k__Bacteria;p__Verrucomicrobia;c__[Spartobacteria];o__[Chthoniobacterales];f__[Chthoniobacteraceae];g__Candidatus Xiphinematobacter	0	0	0	0	0	0	0	0	0	0	0	0	0	0	0	0	0	0	0
	k__Bacteria;p__Verrucomicrobia;c__[Spartobacteria];o__[Chthoniobacterales];f__[Chthoniobacteraceae];g__Chthoniobacter	0	0	0	0	0	0	0	0	0	0	0	0	0	0	0	0	0	0	0
	k__Bacteria;p__Verrucomicrobia;c__[Spartobacteria];o__[Chthoniobacterales];f__[Chthoniobacteraceae];g__DA101	0	0	0	0	0	0	0	0	0	0	0	0	0	0	0	0	0	0	0
	k__Bacteria;p__Verrucomicrobia;c__[Spartobacteria];o__[Chthoniobacterales];f__[Chthoniobacteraceae];g__Ellin506	0	0	0	0	0	0	0	0	0	0	0	0	0	0	0	0	0	0	0
	k__Bacteria;p__WPS-2;c__;o__;f__;g__	0	0	0	0	0	0	0	0	0	0	0	0	0	0	0	0	0	0	0
	k__Bacteria;p__WS1;c__;o__;f__;g__	0	0	0	0	0	0	0	0	0	0	0	0	0	0	0	0	0	0	0
	k__Bacteria;p__WS3;c__PRR-12;o__LD1-PA13;f__;g__	0	0	0	0	0	0	0	0	0	0	0	0	0	0	0	0	0	0	0
	k__Bacteria;p__WS3;c__PRR-12;o__SSS58A;f__;g__	0	0	0	0	0	0	0	0	0	0	0	0	0	0	0	0	0	0	0
	k__Bacteria;p__WS3;c__PRR-12;o__Sediment-1;Other;Other	0	0	0	0	0	0	0	0	0	0	0	0	0	0	0	0	0	0	0
	k__Bacteria;p__WS3;c__PRR-12;o__Sediment-1;f__;g__	0	0	0	0	0	0	0	0	0	0	0	0	0	0	0	0	0	0	0
	k__Bacteria;p__WS3;c__PRR-12;o__Sediment-1;f__PRR-10;g__	0	0	0	0	0	0	0	0	0	0	0	0	0	0	0	0	0	0	0
	k__Bacteria;p__WS3;c__PRR-12;o__wb1_H11;f__;g__	0	0	0	0	0	0	0	0	0	0	0	0	0	0	0	0	0	0	0
	k__Bacteria;p__WS5;c__;o__;f__;g__	0	0	0	0	0	0	0	0	0	0	0	0	0	0	0	0	0	0	0
	k__Bacteria;p__WYO;c__;o__;f__;g__	0	0	0	0	0	0	0	0	0	0	0	0	0	0	0	0	0	0	0
	k__Bacteria;p__ZB3;Other;Other;Other;Other	0	0	0	0	0	0	0	0	0	0	0	0	0	0	0	0	0	0	0
	k__Bacteria;p__ZB3;c__BS119;o__;f__;g__	0	0	0	0	0	0	0	0	0	0	0	0	0	0	0	0	0	0	0
